# Supplementary material for: A Systematic Review of the Cardiometabolic Benefits of Plant Products Containing Mixed Phenolics and Polyphenols in Postmenopausal Women: Insufficient Evidence for Recommendations to This Specific Population
Source: MDPI journal article supplement (doi:10.3390/nu13124276), 2021-11-27
Supplement: s1 [file s1]

## SUPPLEMENTARY MATERIALS

**Table S1.** PRISMA 2020 Checklist

| Section and Topic             | Item # | Checklist item                                                                                                                                                                                                                                                                                       | Location where item is reported |
|-------------------------------|--------|------------------------------------------------------------------------------------------------------------------------------------------------------------------------------------------------------------------------------------------------------------------------------------------------------|---------------------------------|
| <b>TITLE</b>                  |        |                                                                                                                                                                                                                                                                                                      |                                 |
| Title                         | 1      | Identify the report as a systematic review.                                                                                                                                                                                                                                                          | 1                               |
| <b>ABSTRACT</b>               |        |                                                                                                                                                                                                                                                                                                      |                                 |
| Abstract                      | 2      | See the PRISMA 2020 for Abstracts checklist.                                                                                                                                                                                                                                                         |                                 |
| <b>INTRODUCTION</b>           |        |                                                                                                                                                                                                                                                                                                      |                                 |
| Rationale                     | 3      | Describe the rationale for the review in the context of existing knowledge.                                                                                                                                                                                                                          | 1, 2                            |
| Objectives                    | 4      | Provide an explicit statement of the objective(s) or question(s) the review addresses.                                                                                                                                                                                                               | 2, 3                            |
| <b>METHODS</b>                |        |                                                                                                                                                                                                                                                                                                      |                                 |
| Eligibility criteria          | 5      | Specify the inclusion and exclusion criteria for the review and how studies were grouped for the syntheses.                                                                                                                                                                                          | 3, 4                            |
| Information sources           | 6      | Specify all databases, registers, websites, organisations, reference lists and other sources searched or consulted to identify studies. Specify the date when each source was last searched or consulted.                                                                                            | 3                               |
| Search strategy               | 7      | Present the full search strategies for all databases, registers and websites, including any filters and limits used.                                                                                                                                                                                 | 3, 4                            |
| Selection process             | 8      | Specify the methods used to decide whether a study met the inclusion criteria of the review, including how many reviewers screened each record and each report retrieved, whether they worked independently, and if applicable, details of automation tools used in the process.                     | 4, 5                            |
| Data collection process       | 9      | Specify the methods used to collect data from reports, including how many reviewers collected data from each report, whether they worked independently, any processes for obtaining or confirming data from study investigators, and if applicable, details of automation tools used in the process. | 4, 5                            |
| Data items                    | 10a    | List and define all outcomes for which data were sought. Specify whether all results that were compatible with each outcome domain in each study were sought (e.g. for all measures, time points, analyses), and if not, the methods used to decide which results to collect.                        | 3 - 6                           |
|                               | 10b    | List and define all other variables for which data were sought (e.g. participant and intervention characteristics, funding sources). Describe any assumptions made about any missing or unclear information.                                                                                         |                                 |
| Study risk of bias assessment | 11     | Specify the methods used to assess risk of bias in the included studies, including details of the tool(s) used, how many reviewers assessed each study and whether they worked independently, and if applicable, details of automation tools used in the process.                                    | 4, 5                            |
| Effect measures               | 12     | Specify for each outcome the effect measure(s) (e.g. risk ratio, mean difference) used in the synthesis or presentation of results.                                                                                                                                                                  | 4                               |
| Synthesis                     | 13a    | Describe the processes used to decide which studies were eligible for each synthesis (e.g. tabulating the study intervention characteristics                                                                                                                                                         | 4, 5                            |

| Section and Topic             | Item # | Checklist item                                                                                                                                                                                                                                              | Location where item is reported                            |
|-------------------------------|--------|-------------------------------------------------------------------------------------------------------------------------------------------------------------------------------------------------------------------------------------------------------------|------------------------------------------------------------|
| methods                       |        | and comparing against the planned groups for each synthesis (item #5)).                                                                                                                                                                                     |                                                            |
|                               | 13b    | Describe any methods required to prepare the data for presentation or synthesis, such as handling of missing summary statistics, or data conversions.                                                                                                       | 4                                                          |
|                               | 13c    | Describe any methods used to tabulate or visually display results of individual studies and syntheses.                                                                                                                                                      | 10                                                         |
|                               | 13d    | Describe any methods used to synthesize results and provide a rationale for the choice(s). If meta-analysis was performed, describe the model(s), method(s) to identify the presence and extent of statistical heterogeneity, and software package(s) used. | 10                                                         |
|                               | 13e    | Describe any methods used to explore possible causes of heterogeneity among study results (e.g. subgroup analysis, meta-regression).                                                                                                                        |                                                            |
|                               | 13f    | Describe any sensitivity analyses conducted to assess robustness of the synthesized results.                                                                                                                                                                |                                                            |
| Reporting bias assessment     | 14     | Describe any methods used to assess risk of bias due to missing results in a synthesis (arising from reporting biases).                                                                                                                                     |                                                            |
| Certainty assessment          | 15     | Describe any methods used to assess certainty (or confidence) in the body of evidence for an outcome.                                                                                                                                                       |                                                            |
| <b>RESULTS</b>                |        |                                                                                                                                                                                                                                                             |                                                            |
| Study selection               | 16a    | Describe the results of the search and selection process, from the number of records identified in the search to the number of studies included in the review, ideally using a flow diagram.                                                                | 5, 6                                                       |
|                               | 16b    | Cite studies that might appear to meet the inclusion criteria, but which were excluded, and explain why they were excluded.                                                                                                                                 | 5, 6                                                       |
| Study characteristics         | 17     | Cite each included study and present its characteristics.                                                                                                                                                                                                   | 6, Table 2                                                 |
| Risk of bias in studies       | 18     | Present assessments of risk of bias for each included study.                                                                                                                                                                                                | Supplementary Material (Table S2)                          |
| Results of individual studies | 19     | For all outcomes, present, for each study: (a) summary statistics for each group (where appropriate) and (b) an effect estimate and its precision (e.g. confidence/credible interval), ideally using structured tables or plots.                            | Supplementary Material (Tables S3 to S10)<br>Tables 3 to 6 |
| Results of syntheses          | 20a    | For each synthesis, briefly summarise the characteristics and risk of bias among contributing studies.                                                                                                                                                      | 6, Table 2                                                 |

| Section and Topic                              | Item # | Checklist item                                                                                                                                                                                                                                                                       | Location where item is reported              |
|------------------------------------------------|--------|--------------------------------------------------------------------------------------------------------------------------------------------------------------------------------------------------------------------------------------------------------------------------------------|----------------------------------------------|
|                                                | 20b    | Present results of all statistical syntheses conducted. If meta-analysis was done, present for each the summary estimate and its precision (e.g. confidence/credible interval) and measures of statistical heterogeneity. If comparing groups, describe the direction of the effect. | 10, 12, 15<br>Tables 3 to 6                  |
|                                                | 20c    | Present results of all investigations of possible causes of heterogeneity among study results.                                                                                                                                                                                       |                                              |
|                                                | 20d    | Present results of all sensitivity analyses conducted to assess the robustness of the synthesized results.                                                                                                                                                                           |                                              |
| Reporting biases                               | 21     | Present assessments of risk of bias due to missing results (arising from reporting biases) for each synthesis assessed.                                                                                                                                                              |                                              |
| Certainty of evidence                          | 22     | Present assessments of certainty (or confidence) in the body of evidence for each outcome assessed.                                                                                                                                                                                  | Tables 3 to 6                                |
| <b>DISCUSSION</b>                              |        |                                                                                                                                                                                                                                                                                      |                                              |
| Discussion                                     | 23a    | Provide a general interpretation of the results in the context of other evidence.                                                                                                                                                                                                    |                                              |
|                                                | 23b    | Discuss any limitations of the evidence included in the review.                                                                                                                                                                                                                      | 18 - 22                                      |
|                                                | 23c    | Discuss any limitations of the review processes used.                                                                                                                                                                                                                                | 18 - 22                                      |
|                                                | 23d    | Discuss implications of the results for practice, policy, and future research.                                                                                                                                                                                                       | 18 - 22                                      |
| <b>OTHER INFORMATION</b>                       |        |                                                                                                                                                                                                                                                                                      |                                              |
| Registration and protocol                      | 24a    | Provide registration information for the review, including register name and registration number, or state that the review was not registered.                                                                                                                                       |                                              |
|                                                | 24b    | Indicate where the review protocol can be accessed, or state that a protocol was not prepared.                                                                                                                                                                                       | 3, 4                                         |
|                                                | 24c    | Describe and explain any amendments to information provided at registration or in the protocol.                                                                                                                                                                                      |                                              |
| Support                                        | 25     | Describe sources of financial or non-financial support for the review, and the role of the funders or sponsors in the review.                                                                                                                                                        | 23                                           |
| Competing interests                            | 26     | Declare any competing interests of review authors.                                                                                                                                                                                                                                   | 23                                           |
| Availability of data, code and other materials | 27     | Report which of the following are publicly available and where they can be found: template data collection forms; data extracted from included studies; data used for all analyses; analytic code; any other materials used in the review.                                           | Supplementary Material<br>(Tables S1 to S10) |

From: Page MJ, McKenzie JE, Bossuyt PM, Boutron I, Hoffmann TC, Mulrow CD, et al. The PRISMA 2020 statement: an updated guideline for reporting systematic reviews. BMJ 2021;372:n71. doi: 10.1136/bmj.n71.

Table S2. Risk of Bias Tools.

| Reference                          | Selection bias | Performance bias—blinding |             | Attrition bias – flow of participants | Other bias             |             |         | Risk of bias Score (Overall)* |
|------------------------------------|----------------|---------------------------|-------------|---------------------------------------|------------------------|-------------|---------|-------------------------------|
|                                    |                | Blinding                  | Performance |                                       | Baseline comparability | Data report | Funding |                               |
| Cheng et al., 2004 [36]            | 1              | 2                         | 0           | 1                                     | 1                      | 1           | 1       | 7.0                           |
| Sathyapalan et al., 2018 [37]      | 1              | 2                         | 0           | 1                                     | 1                      | 1           | 1       | 7.0                           |
| Myasoedova et al., 2016 [35]       | 0              | 2                         | 0           | 1                                     | 1                      | 1           | 1       | 6.0                           |
| Wu et al., 2012 [38]               | 0              | 2                         | 0           | 0                                     | 1                      | 1           | 1       | 5.0                           |
| Curtis et al., 2009 [39]           | 0              | 2                         | 0.5         | 1                                     | 0                      | 1           | 1       | 5.5                           |
| Zern et al., 2005 [40]             | 0              | 1                         | 1           | 0                                     | 0                      | 1           | 1       | 4.0                           |
| Chai et al., 2012 [41]             | 1              | 1                         | 0.5         | 1                                     | 1                      | 1           | 1       | 6.5                           |
| Al-Dashti et al., 2019 [34]        | 1              | 0                         | 0.5         | 1                                     | 0                      | 1           | 1       | 4.5                           |
| García-Yu et al., 2020 [42]        | 1              | 1                         | 0.5         | 1                                     | 1                      | 1           | 1       | 6.5                           |
| García-Yu et al., 2021[43]         | 1              | 1                         | 0.5         | 1                                     | 1                      | 1           | 1       | 6.5                           |
| Estévez-Santiago et al., 2019 [44] | 0              | 0                         | 0           | 1                                     | 1                      | 1           | 1       | 4.0                           |
| Trius-Soler et al., 2021 [32]      | 0              | 0                         | 0.5         | 1                                     | 1                      | 1           | 1       | 4.5                           |

|                                     |   |   |     |   |   |   |   |     |
|-------------------------------------|---|---|-----|---|---|---|---|-----|
| Filip et al., 2015 [28]             | 1 | 2 | 0.5 | 1 | 1 | 1 | 1 | 7.5 |
| Wang-Polagruto et al., 2006 [25]    | 0 | 2 | 0.5 | 0 | 1 | 1 | 1 | 5.5 |
| Naissides et al., 2006a [26]        | 1 | 0 | 1   | 1 | 1 | 1 | 1 | 6.0 |
| Naissides et al., 2006b [27]        | 1 | 0 | 1   | 0 | 1 | 1 | 1 | 5.0 |
| Aubertin-Leheudre et al., 2008 [45] | 0 | 2 | 0.5 | 1 | 0 | 1 | 1 | 5.5 |
| Dostal et al., 2016 [33]            | 1 | 2 | 0.5 | 1 | 1 | 1 | 1 | 7.5 |
| Johnson et al., 2015 [29]           | 1 | 2 | 0   | 1 | 1 | 1 | 1 | 7.0 |
| Johnson et al., 2017 [30]           | 1 | 2 | 0.5 | 1 | 1 | 1 | 1 | 7.5 |
| D'Anna et al., 2014 [31]            | 1 | 0 | 0.5 | 1 | 1 | 1 | 1 | 5.5 |

\*: Risk of bias Score: low risk ( $\geq 8$  and  $\leq 10$ ), moderate risk ( $\geq 5$  and  $< 8$ ), high risk ( $< 5$ ).

**Table S3.** Changes in markers of glucose metabolism as reported in human RCTs (parallel or crossover design) looking at the chronic effects of (poly)phenol-containing products in postmenopausal women, without hormone replacement therapy.

| References                    | Health status | Treatment Groups<br>(N participants per group)                | (Poly) phenols                                               | Dose (poly) phenols (mg /d)                                                | Duration (d) | Markers of glucose metabolism |                                                                          |                     |                                                                          |                     |                                           |  |
|-------------------------------|---------------|---------------------------------------------------------------|--------------------------------------------------------------|----------------------------------------------------------------------------|--------------|-------------------------------|--------------------------------------------------------------------------|---------------------|--------------------------------------------------------------------------|---------------------|-------------------------------------------|--|
|                               |               |                                                               |                                                              |                                                                            |              | Parameter                     | Control/Placebo/Comparator                                               | Δ (A – B) (p-value) | Treatment                                                                | Δ (A – B) (p-value) | Δ (Treatment – Control/Placebo) (p-value) |  |
| Cheng et al., 2004 [36]       | Healthy       | Capsules<br><br>Estrogen (11)<br>Isoflavone (17)              | Isoflavones (daidzein and genistein) in evening primrose oil | 100                                                                        | 90<br>180    | Glucose (mg/dL)               | B: 118.0 ± 46.0                                                          | -24.0               | B: 102.0 ± 18.0                                                          | -12.0               | +12.0                                     |  |
|                               |               |                                                               |                                                              |                                                                            |              |                               | A90: 94.0 ± 20.0                                                         | -26.0               | A90: 90.0 ± 24.0                                                         | -21.0               | +5.0                                      |  |
|                               |               |                                                               |                                                              |                                                                            |              |                               | A180: 92.0 ± 21.0                                                        | (0.001)             | A180: 81.0 ± 25.0                                                        | (0.001)             | (NS)                                      |  |
|                               |               |                                                               |                                                              |                                                                            |              | Insulin (μIU/mL)              | B: 11.0 ± 9.0                                                            | -5.0                | B: 12.0 ± 12.0                                                           | -8.0                | -3.0                                      |  |
| A90: 6.0 ± 7.0                | -5.0          | A90: 4.0 ± 3.0                                                | -7.0                                                         | -2.0                                                                       |              |                               |                                                                          |                     |                                                                          |                     |                                           |  |
| A180: 6.0 ± 11.0              | (0.005)       | A180: 5.0 ± 8.0                                               | (0.005)                                                      | (NS)                                                                       |              |                               |                                                                          |                     |                                                                          |                     |                                           |  |
| Sathyapalan et al., 2018 [37] | Healthy       | Snack bars (soy protein free isoflavones or with isoflavones) | Mix isoflavones                                              | 66                                                                         | 180          | Glucose (mg/dL)               | B: 91.8 ± 28.8                                                           | -1.8                | B: 93.6 ± 12.6                                                           | -14.4               | -12.6                                     |  |
|                               |               |                                                               |                                                              |                                                                            |              |                               | A: 90.0 ± 16.2                                                           | (NI)                | A: 79.2 ± 9.0                                                            | (NI)                | (<0.010)                                  |  |
|                               |               |                                                               |                                                              |                                                                            |              | Insulin (μIU/mL)              | B: 5.7 ± 3.7                                                             | +0.11               | B: 5.8 ± 3.6                                                             | -3.1                | -3.3                                      |  |
|                               |               |                                                               |                                                              |                                                                            |              |                               | A: 5.8 ± 3.7                                                             | (NI)                | A: 2.6 ± 1.9                                                             | (NI)                | (<0.010)                                  |  |
|                               |               | Placebo (60)<br>Treated (60)                                  | HOMA-IR                                                      | B: 1.4 ± 1.8                                                               | -0.04        | B: 1.4 ± 1.0                  | -0.86                                                                    | -0.82               |                                                                          |                     |                                           |  |
|                               |               |                                                               |                                                              | A: 1.4 ± 1.4                                                               | (NI)         | A: 0.50 ± 0.40                | (NI)                                                                     | (<0.010)            |                                                                          |                     |                                           |  |
| Wu et al., 2012 [38]          | Healthy       | Green tea extract capsules                                    | Mix (poly)phenols (mostly EGCG plus EC, EGC, ECG, and GCG)   | T1: 400<br>T2: 800                                                         | 60           | Glucose (mg/dL)               | B: 97.0 [91.0, 103.0] <sup>§</sup><br>A: 99.0 [94.0, 105.0] <sup>§</sup> | +2.0<br>(0.052)     | T1: Group G400                                                           | G400                | Group G400 vs P                           |  |
|                               |               |                                                               |                                                              |                                                                            |              |                               |                                                                          |                     | B: 99.0 [94.0, 105.0] <sup>§</sup><br>A: 98.0 [93.0, 103.0] <sup>§</sup> | -1.0<br>(NS)        | -3.0<br>(NI)                              |  |
|                               |               | Placebo (32)<br>T1: G400 (37)<br>T2: G800 (34)                | T2: Group G800                                               | B: 103.0 [97.0, 110.0] <sup>§</sup><br>A: 101.0 [95.0, 106.0] <sup>§</sup> | G800         |                               | Group G800 vs P                                                          |                     |                                                                          |                     |                                           |  |
|                               |               |                                                               |                                                              | -2.0<br>(NS)                                                               | -4.0<br>(NI) |                               |                                                                          |                     |                                                                          |                     |                                           |  |
|                               |               |                                                               |                                                              |                                                                            |              |                               |                                                                          |                     |                                                                          |                     |                                           |  |
|                               |               |                                                               |                                                              |                                                                            |              |                               |                                                                          |                     |                                                                          |                     |                                           |  |
|                               |               |                                                               |                                                              |                                                                            |              |                               |                                                                          |                     |                                                                          |                     |                                           |  |
|                               |               |                                                               |                                                              |                                                                            |              |                               |                                                                          |                     |                                                                          |                     |                                           |  |
|                               |               |                                                               |                                                              |                                                                            |              |                               |                                                                          |                     |                                                                          |                     |                                           |  |
|                               |               |                                                               |                                                              |                                                                            |              |                               |                                                                          |                     |                                                                          |                     |                                           |  |
|                               |               |                                                               |                                                              |                                                                            |              |                               |                                                                          |                     |                                                                          |                     |                                           |  |
|                               |               |                                                               |                                                              |                                                                            |              |                               |                                                                          |                     |                                                                          |                     |                                           |  |
|                               |               |                                                               |                                                              |                                                                            |              |                               |                                                                          |                     |                                                                          |                     |                                           |  |
|                               |               |                                                               |                                                              |                                                                            |              |                               |                                                                          |                     |                                                                          |                     |                                           |  |
|                               |               |                                                               |                                                              |                                                                            |              |                               |                                                                          |                     |                                                                          |                     |                                           |  |
|                               |               |                                                               |                                                              |                                                                            |              |                               |                                                                          |                     |                                                                          |                     |                                           |  |
|                               |               |                                                               |                                                              |                                                                            |              |                               |                                                                          |                     |                                                                          |                     |                                           |  |
|                               |               |                                                               |                                                              |                                                                            |              |                               |                                                                          |                     |                                                                          |                     |                                           |  |
|                               |               |                                                               |                                                              |                                                                            |              |                               |                                                                          |                     |                                                                          |                     |                                           |  |
|                               |               |                                                               |                                                              |                                                                            |              |                               |                                                                          |                     |                                                                          |                     |                                           |  |
|                               |               |                                                               |                                                              |                                                                            |              |                               |                                                                          |                     |                                                                          |                     |                                           |  |
|                               |               |                                                               |                                                              |                                                                            |              |                               |                                                                          |                     |                                                                          |                     |                                           |  |
|                               |               |                                                               |                                                              |                                                                            |              |                               |                                                                          |                     |                                                                          |                     |                                           |  |
|                               |               |                                                               |                                                              |                                                                            |              |                               |                                                                          |                     |                                                                          |                     |                                           |  |
|                               |               |                                                               |                                                              |                                                                            |              |                               |                                                                          |                     |                                                                          |                     |                                           |  |
|                               |               |                                                               |                                                              |                                                                            |              |                               |                                                                          |                     |                                                                          |                     |                                           |  |
|                               |               |                                                               |                                                              |                                                                            |              |                               |                                                                          |                     |                                                                          |                     |                                           |  |
|                               |               |                                                               |                                                              |                                                                            |              |                               |                                                                          |                     |                                                                          |                     |                                           |  |
|                               |               |                                                               |                                                              |                                                                            |              |                               |                                                                          |                     |                                                                          |                     |                                           |  |
|                               |               |                                                               |                                                              |                                                                            |              |                               |                                                                          |                     |                                                                          |                     |                                           |  |
|                               |               |                                                               |                                                              |                                                                            |              |                               |                                                                          |                     |                                                                          |                     |                                           |  |
|                               |               |                                                               |                                                              |                                                                            |              |                               |                                                                          |                     |                                                                          |                     |                                           |  |
|                               |               |                                                               |                                                              |                                                                            |              |                               |                                                                          |                     |                                                                          |                     |                                           |  |
|                               |               |                                                               |                                                              |                                                                            |              |                               |                                                                          |                     |                                                                          |                     |                                           |  |
|                               |               |                                                               |                                                              |                                                                            |              |                               |                                                                          |                     |                                                                          |                     |                                           |  |
|                               |               |                                                               |                                                              |                                                                            |              |                               |                                                                          |                     |                                                                          |                     |                                           |  |
|                               |               |                                                               |                                                              |                                                                            |              |                               |                                                                          |                     |                                                                          |                     |                                           |  |
|                               |               |                                                               |                                                              |                                                                            |              |                               |                                                                          |                     |                                                                          |                     |                                           |  |
|                               |               |                                                               |                                                              |                                                                            |              |                               |                                                                          |                     |                                                                          |                     |                                           |  |
|                               |               |                                                               |                                                              |                                                                            |              |                               |                                                                          |                     |                                                                          |                     |                                           |  |
|                               |               |                                                               |                                                              |                                                                            |              |                               |                                                                          |                     |                                                                          |                     |                                           |  |
|                               |               |                                                               |                                                              |                                                                            |              |                               |                                                                          |                     |                                                                          |                     |                                           |  |
|                               |               |                                                               |                                                              |                                                                            |              |                               |                                                                          |                     |                                                                          |                     |                                           |  |
|                               |               |                                                               |                                                              |                                                                            |              |                               |                                                                          |                     |                                                                          |                     |                                           |  |
|                               |               |                                                               |                                                              |                                                                            |              |                               |                                                                          |                     |                                                                          |                     |                                           |  |
|                               |               |                                                               |                                                              |                                                                            |              |                               |                                                                          |                     |                                                                          |                     |                                           |  |
|                               |               |                                                               |                                                              |                                                                            |              |                               |                                                                          |                     |                                                                          |                     |                                           |  |
|                               |               |                                                               |                                                              |                                                                            |              |                               |                                                                          |                     |                                                                          |                     |                                           |  |
|                               |               |                                                               |                                                              |                                                                            |              |                               |                                                                          |                     |                                                                          |                     |                                           |  |
|                               |               |                                                               |                                                              |                                                                            |              |                               |                                                                          |                     |                                                                          |                     |                                           |  |
|                               |               |                                                               |                                                              |                                                                            |              |                               |                                                                          |                     |                                                                          |                     |                                           |  |
|                               |               |                                                               |                                                              |                                                                            |              |                               |                                                                          |                     |                                                                          |                     |                                           |  |
|                               |               |                                                               |                                                              |                                                                            |              |                               |                                                                          |                     |                                                                          |                     |                                           |  |
|                               |               |                                                               |                                                              |                                                                            |              |                               |                                                                          |                     |                                                                          |                     |                                           |  |
|                               |               |                                                               |                                                              |                                                                            |              |                               |                                                                          |                     |                                                                          |                     |                                           |  |
|                               |               |                                                               |                                                              |                                                                            |              |                               |                                                                          |                     |                                                                          |                     |                                           |  |
|                               |               |                                                               |                                                              |                                                                            |              |                               |                                                                          |                     |                                                                          |                     |                                           |  |
|                               |               |                                                               |                                                              |                                                                            |              |                               |                                                                          |                     |                                                                          |                     |                                           |  |
|                               |               |                                                               |                                                              |                                                                            |              |                               |                                                                          |                     |                                                                          |                     |                                           |  |
|                               |               |                                                               |                                                              |                                                                            |              |                               |                                                                          |                     |                                                                          |                     |                                           |  |
|                               |               |                                                               |                                                              |                                                                            |              |                               |                                                                          |                     |                                                                          |                     |                                           |  |
|                               |               |                                                               |                                                              |                                                                            |              |                               |                                                                          |                     |                                                                          |                     |                                           |  |
|                               |               |                                                               |                                                              |                                                                            |              |                               |                                                                          |                     |                                                                          |                     |                                           |  |
|                               |               |                                                               |                                                              |                                                                            |              |                               |                                                                          |                     |                                                                          |                     |                                           |  |
|                               |               |                                                               |                                                              |                                                                            |              |                               |                                                                          |                     |                                                                          |                     |                                           |  |

|                                |         |                                                   |                                                                            |     |     | Insulin<br>(μIU/mL) | B: 7.3 [5.7, 9.5] <sup>δ</sup><br>A: 8.9 [6.9, 11.5] <sup>δ</sup>          |  | +1.6<br>(0.059) | T1: Group G400<br>B: 8.5 [6.6, 10.9] <sup>δ</sup><br>A: 8.3 [6.5, 10.9] <sup>δ</sup>  | G400<br>-0.20<br>(NS)           | Group G400 <i>vs</i> P<br>-1.8<br>(NI) |                                    |
|--------------------------------|---------|---------------------------------------------------|----------------------------------------------------------------------------|-----|-----|---------------------|----------------------------------------------------------------------------|--|-----------------|---------------------------------------------------------------------------------------|---------------------------------|----------------------------------------|------------------------------------|
|                                |         |                                                   |                                                                            |     |     |                     |                                                                            |  |                 | T2: Group G800<br>B: 9.5 [ 7.4, 12.3] <sup>δ</sup><br>A: 9.0 [7.0, 11.5] <sup>δ</sup> | G800<br>-0.50<br>(NS)           | Group G800 <i>vs</i> P<br>-2.1<br>(NI) |                                    |
|                                |         |                                                   |                                                                            |     |     |                     |                                                                            |  |                 | Groups <i>vs</i> P<br>NI<br>(0.010)                                                   |                                 |                                        |                                    |
|                                |         |                                                   |                                                                            |     |     |                     |                                                                            |  |                 | Group G800 <i>vs</i> G400<br>-0.30<br>(NS)                                            |                                 |                                        |                                    |
|                                |         |                                                   |                                                                            |     |     |                     |                                                                            |  |                 |                                                                                       |                                 |                                        |                                    |
| Curtis et al.,<br>2009 [39]    | Healthy | Elderberry extract capsules<br>(125 mg)           | Mix anthocyanins<br>(mostly cyanidin-<br>3-glucoside) per<br>capsule       | 500 | 84  | Glucose<br>(mg/dL)  | B: 86.4 ± 9.0<br>A: 90.0 ± 10.8                                            |  | +3.6<br>(NS)    | B: 88.2 ± 7.2<br>A: 88.2 ± 7.2                                                        |                                 | 0.0<br>(NS)                            | -3.6<br>(NS)                       |
|                                |         | Placebo (26)<br>Treated (26)                      |                                                                            |     |     |                     |                                                                            |  |                 |                                                                                       |                                 |                                        |                                    |
| Al-Dashi et.,<br>al 2019 [34]  | Healthy | Prunes                                            | Mix (poly)<br>phenols<br>(chlorogenic,<br>neochlorogenic<br>acids, others) | NI  | 14  | Glucose<br>(mg/dL)  | T1: Low dose<br>B: 95.0 <sup>δ</sup> ± 16.0<br>A: 96.0 <sup>δ</sup> ± 15.0 |  | +3.0<br>(0.030) | T2: High dose<br>B: 98.0 <sup>δ</sup> ± 14.0<br>A: 96.0 <sup>δ</sup> ± 15.0           |                                 | -3.0<br>(NS)                           | High <i>vs</i> Low<br>-5.0<br>(NS) |
|                                |         | T1: Low dose 14 g (27)<br>T2: High dose 42 g (27) |                                                                            |     |     |                     | T1: Low dose<br>B: 4.5 <sup>δ</sup> ± 3.9<br>A: 4.6 <sup>δ</sup> ± 3.6     |  |                 | T2: High dose<br>B: 4.4 <sup>δ</sup> ± 3.9<br>A: 4.5 <sup>δ</sup> ± 3.9               |                                 |                                        |                                    |
|                                |         |                                                   |                                                                            |     |     | Insulin<br>(μIU/mL) | B: 86.2 ± 8.5<br>A: 87.2 ± 8.7                                             |  | +1.0<br>(NS)    | B: 86.4 ± 8.8<br>A: 86.6 ± 10.0                                                       |                                 | +0.20<br>(NS)                          | -0.80<br>(NS)                      |
|                                |         |                                                   |                                                                            |     |     |                     | B: 7.5 ± 2.9<br>A: 7.8 ± 3.6                                               |  |                 | +0.30<br>(NS)                                                                         | B: 8.2 ± 3.4<br>A: 8.3 ± 5.1    |                                        |                                    |
| García-Yu et<br>al., 2020 [42] | Healthy | 10g of dark chocolate (99%<br>cocoa)              | Flavanols                                                                  | 65  | 180 | Glucose<br>(mg/dL)  | B: 86.2 ± 8.5<br>A: 87.2 ± 8.7                                             |  | +1.0<br>(NS)    |                                                                                       | B: 86.4 ± 8.8<br>A: 86.6 ± 10.0 |                                        | +0.20<br>(NS)                      |
|                                |         |                                                   |                                                                            |     |     |                     | B: 7.5 ± 2.9<br>A: 7.8 ± 3.6                                               |  |                 | +0.30<br>(NS)                                                                         | B: 8.2 ± 3.4<br>A: 8.3 ± 5.1    |                                        |                                    |
|                                |         | Control (66)<br>Treated (71)                      |                                                                            |     |     | HOMA-IR             | B: 1.6 ± 0.70<br>A: 1.7 ± 0.90                                             |  | +0.10<br>(NS)   |                                                                                       | B: 1.8 ± 0.80<br>A: 1.8 ± 1.4   |                                        | +0.10<br>(NS)                      |
|                                |         |                                                   |                                                                            |     |     |                     |                                                                            |  |                 |                                                                                       |                                 |                                        |                                    |
|                                | Healthy | 10g of dark chocolate (99%<br>cocoa)              | Flavanols                                                                  | 65  | 120 | Insulin*<br>(mg/dL) | B: 7.3 ± 2.7<br>A: NI                                                      |  | NI<br>(NS)      | B: 8.6 ± 3.4<br>A: NI                                                                 |                                 | NI<br>(NS)                             | NI<br>(NS)                         |

|                                           |         |                                         |                  |     |                    |                    |                    |                      |                      |                       |                       |
|-------------------------------------------|---------|-----------------------------------------|------------------|-----|--------------------|--------------------|--------------------|----------------------|----------------------|-----------------------|-----------------------|
| García- Yu<br>et al., 2021<br>[43]        |         | Control (61)                            |                  |     |                    | HOMA-IR            | B: 1.6 ± 0.60      | NI                   | B: 1.9 ± 0.90        | NI                    | NI                    |
|                                           |         | Treated (67)                            |                  |     |                    |                    | A: NI              | (NS)                 | A: NI                | (NS)                  | (NS)                  |
| Estévez-<br>Santiago et<br>al., 2019 [44] | Healthy | Capsules                                | T1: Anthocyanins | T1: | 120                | Glucose<br>(mg/dL) | <b>T1: Group X</b> |                      | <b>T2: Group A</b>   |                       | <b>Group A vs X</b>   |
|                                           |         |                                         | T2: Xanthophylls | 8.0 | 240                |                    | B: 92.3 ± 7.4      | <b>-0.18</b>         | B: 89.6 ± 8.5        | <b>-2.5</b>           | <b>-2.3</b>           |
|                                           |         | T1: Group X (26)                        | (lutein +        | T2: |                    |                    | A120: 92.2 ± 6.7   | <b>-1.1</b>          | A120: 92.2 ± 9.0     | <b>-2.5</b>           | <b>-1.4</b>           |
|                                           |         | T2: Group A (23)                        | zeaxanthin)      | 60  |                    |                    | A240: 91.3 ± 10.1  | (NS)                 | A240: 92.2 ± 6.7     | (NS)                  | (NS)                  |
|                                           |         | T3: Group A+X (23)                      | T3: Anthocyanins | T3: | 68                 |                    |                    |                      | <b>T3: Group A+X</b> |                       | <b>Group A+X vs X</b> |
|                                           |         |                                         | and xanthophylls |     |                    |                    |                    |                      | B: 87.8 ± 6.8        | <b>+1.8</b>           | <b>+1.9</b>           |
|                                           |         |                                         | (lutein +        |     |                    |                    |                    |                      | A120: 89.6 ± 6.7     | (NS)                  | <b>-1.2</b>           |
|                                           |         |                                         | zeaxanthin)      |     |                    |                    |                    |                      | A240: 85.5 ± 5.9     | <b>-2.3</b>           | (NS)                  |
|                                           |         |                                         |                  |     |                    |                    |                    |                      |                      | ( $< 0.050$ )         |                       |
|                                           |         |                                         |                  |     |                    |                    |                    |                      |                      |                       |                       |
|                                           |         |                                         |                  |     |                    |                    |                    |                      | <b>+4.3</b>          |                       |                       |
|                                           |         |                                         |                  |     |                    |                    |                    |                      | <b>+0.18</b>         |                       |                       |
|                                           |         |                                         |                  |     |                    |                    |                    |                      | (NS)                 |                       |                       |
|                                           |         |                                         |                  |     |                    |                    |                    |                      |                      | <b>Group A vs X</b>   |                       |
|                                           |         |                                         |                  |     |                    |                    |                    |                      |                      | <b>-0.10</b>          |                       |
|                                           |         |                                         |                  |     |                    |                    |                    |                      |                      | <b>+0.90</b>          |                       |
|                                           |         |                                         |                  |     |                    |                    |                    |                      |                      | (NS)                  |                       |
|                                           |         |                                         |                  |     |                    |                    |                    |                      |                      | <b>Group A+X vs X</b> |                       |
|                                           |         |                                         |                  |     |                    |                    |                    |                      |                      | <b>+0.60</b>          |                       |
|                                           |         |                                         |                  |     |                    |                    |                    |                      |                      | <b>+0.70</b>          |                       |
|                                           |         |                                         |                  |     |                    |                    |                    |                      |                      | (NS)                  |                       |
|                                           |         |                                         |                  |     |                    |                    |                    |                      |                      | <b>Group A+X vs A</b> |                       |
|                                           |         |                                         |                  |     |                    |                    |                    |                      |                      | <b>+0.70</b>          |                       |
|                                           |         |                                         |                  |     |                    |                    |                    |                      |                      | <b>-0.20</b>          |                       |
|                                           |         |                                         |                  |     |                    |                    |                    |                      |                      | (NS)                  |                       |
| Trius-Soler<br>et al., 2021<br>[32]       | Healthy | Beer beverage with and Prenylflavonoids | T1:              | 180 | Glucose<br>(mg/dL) |                    |                    | <b>T1: Group AB</b>  |                      | <b>Group AB vs C</b>  |                       |
|                                           |         | without alcohol                         | 0.35             |     |                    | A: 91.0 ± 6.0      | NI                 | B: 94.0 ± 8.0        | NI                   | +0.70                 |                       |
|                                           |         | Control (14)                            | 9                |     |                    | B: NI              | (NS)               | A:NI                 | (NS)                 | (NS)                  |                       |
|                                           |         | T1: Group AB (16)                       | T2:              |     |                    |                    |                    |                      |                      |                       |                       |
|                                           |         | T2: Group NAB (7)                       | 0.25             |     |                    |                    |                    | <b>T2: Group NAB</b> |                      | <b>Group NAB vs C</b> |                       |
|                                           |         |                                         | 9                |     |                    |                    |                    | B: 97.0 ± 12.0       | NI                   | +3.0                  |                       |
|                                           |         |                                         |                  |     |                    |                    |                    | A: NI                | (NS)                 | (NS)                  |                       |



|                              |                                         |    |                                                                                            |                                         |      |     |                                        |                                                |                     |                                                 |                     |                                        |
|------------------------------|-----------------------------------------|----|--------------------------------------------------------------------------------------------|-----------------------------------------|------|-----|----------------------------------------|------------------------------------------------|---------------------|-------------------------------------------------|---------------------|----------------------------------------|
|                              |                                         |    |                                                                                            |                                         |      |     | Groups <i>vs</i> C<br>NI<br>(NS)       |                                                |                     |                                                 |                     |                                        |
|                              |                                         |    |                                                                                            |                                         |      |     | Group NAB <i>vs</i> AB<br>+2.0<br>(NS) |                                                |                     |                                                 |                     |                                        |
| D’Anna et al., 2014 [31]     | Diagnosis of metabolic syndrome (Obese) | of | Capsules (30 mg of cocoa (poly)phenols, 80 mg of soy isoflavones, and 2 g of myo-inositol) | Cocoa (poly)phenols and soy isoflavones | 110  | 180 | Glucose<br>(mg/dL)                     | B: 105.0 ± 7.0<br>A: 108.0 ± 10.0              | +3.0<br>(NS)        | B: 110.0 ± 10.0<br>A: 96.0 ± 7.0                | -14.0<br>(<0.001)   | -17.0<br>(<0.001)                      |
|                              |                                         |    | Placebo (21)<br>Treated (22)                                                               |                                         |      |     |                                        |                                                |                     |                                                 |                     |                                        |
| Naissides et al., 2006b [27] | Dyslipidaemia (high cholesterol)        |    | Red wine RW (2.5 g (poly)phenols/L)                                                        | Mix wine (poly)phenols                  | 1000 | 42  | Glucose<br>(mg/dL)                     | B: 91.98 ± 7.9<br>A: 91.98 ± 7.2               | 0.0<br>(NS)         | T1: Group DRW<br>B: 92.9 ± 7.6<br>A: 91.3 ± 4.1 | DRW<br>-1.6<br>(NS) | Group DRW <i>vs</i> C<br>-1.6<br>(NS)  |
|                              |                                         |    | Control (400 mL water) (16)                                                                |                                         |      |     |                                        | T2: Group RW<br>B: 91.1 ± 5.4<br>A: 94.3 ± 5.9 | RW<br>+3.2<br>(NS)  | Group RW <i>vs</i> C<br>+3.2<br>(NS)            |                     |                                        |
|                              |                                         |    | T1: Group DRW non-alcohol (400 mL) (15)                                                    |                                         |      |     |                                        |                                                |                     | Groups <i>vs</i> C<br>NI<br>(NS)                |                     |                                        |
|                              |                                         |    | T2: Group RW alcohol (400 mL) (14)                                                         |                                         |      |     |                                        |                                                |                     | Group DRW <i>vs</i> RW<br>-4.9<br>(NS)          |                     |                                        |
|                              |                                         |    |                                                                                            |                                         |      |     |                                        |                                                |                     |                                                 |                     |                                        |
|                              |                                         |    |                                                                                            |                                         |      |     | Insulin<br>(µIU/mL)                    | B: 5.5 ± 3.5<br>A: 5.3 ± 0.60                  | -0.16<br>(NS)       | T1: Group DRW<br>B: 6.1 ± 3.1<br>A: 5.0 ± 1.5   | DRW<br>-1.0<br>(NS) | Group DRW <i>vs</i> C<br>-0.87<br>(NS) |
|                              |                                         |    |                                                                                            |                                         |      |     |                                        | T2: Group RW<br>B: 5.4 ± 4.0<br>A: 5.8 ± 5.9   | RW<br>+0.40<br>(NS) | Group RW <i>vs</i> C<br>+0.56<br>(NS)           |                     |                                        |

|                                            |                      |                                 |                                                      |      |     |                  |                                                                        | Groups <i>vs</i> C<br>NI<br>(NS)                |                                                                         |               |               |  |
|--------------------------------------------|----------------------|---------------------------------|------------------------------------------------------|------|-----|------------------|------------------------------------------------------------------------|-------------------------------------------------|-------------------------------------------------------------------------|---------------|---------------|--|
|                                            |                      |                                 |                                                      |      |     |                  |                                                                        | Group DRW <i>vs</i> RW<br>-1.4<br>(NS)          |                                                                         |               |               |  |
|                                            |                      |                                 |                                                      |      |     |                  |                                                                        | T1: Group DRW<br>B: 1.3 ± 0.88<br>A: 1.2 ± 0.56 |                                                                         |               |               |  |
|                                            |                      |                                 |                                                      |      |     |                  |                                                                        | -0.05<br>(NS)                                   |                                                                         |               |               |  |
|                                            |                      |                                 |                                                      |      |     |                  |                                                                        | B: 1.4 ± 0.73<br>A: 1.1 ± 0.34                  |                                                                         |               |               |  |
|                                            |                      |                                 |                                                      |      |     |                  |                                                                        | -0.25<br>(NS)                                   |                                                                         |               |               |  |
|                                            |                      |                                 |                                                      |      |     |                  |                                                                        | Group DRW <i>vs</i> C<br>-0.20<br>(NS)          |                                                                         |               |               |  |
|                                            |                      |                                 |                                                      |      |     |                  |                                                                        | T2: Group RW<br>B: 1.2 ± 0.97<br>A: 1.4 ± 1.5   |                                                                         |               |               |  |
|                                            |                      |                                 |                                                      |      |     |                  |                                                                        | RW<br>+0.13<br>(NS)                             |                                                                         |               |               |  |
| HOMA-IR                                    |                      |                                 |                                                      |      |     |                  |                                                                        | Group RW <i>vs</i> C<br>+0.18<br>(NS)           |                                                                         |               |               |  |
|                                            |                      |                                 |                                                      |      |     |                  |                                                                        | Groups <i>vs</i> C<br>NI<br>(NS)                |                                                                         |               |               |  |
|                                            |                      |                                 |                                                      |      |     |                  |                                                                        | Group DRW <i>vs</i> RW<br>-0.38<br>(NS)         |                                                                         |               |               |  |
| Aubertin-<br>Leheudre et<br>al., 2008 [45] | Obese                | Soybeans capsules (17.5 mg)     | Mix isoflavones (daidzein, glycitein, and genistein) | 70   | 180 | Glucose (mg/dL)  | B: 89.3 ± 10.6<br>A: 89.5 ± 7.4                                        | +0.18<br>(NS)                                   | B: 90.2 ± 8.8<br>A: 88.4 ± 8.6                                          | -1.8<br>(NS)  | -1.9<br>(NS)  |  |
|                                            |                      |                                 |                                                      |      |     |                  |                                                                        |                                                 |                                                                         |               |               |  |
|                                            |                      |                                 |                                                      |      |     |                  |                                                                        |                                                 |                                                                         |               |               |  |
|                                            |                      |                                 |                                                      |      |     |                  |                                                                        |                                                 |                                                                         |               |               |  |
| Dostal et al.,<br>2016 [33]                | Obese and overweight | Capsules (1315 mg of catechins) | Catechins                                            | 1315 | 365 | Glucose (mg/dL)  | B: 97.3 [95.0, 99.7] <sup>δ</sup><br>A: 94.7 [92.5, 97.0] <sup>δ</sup> | -1.9<br>(NS)                                    | B: 97.6 [95.3, 100.0] <sup>δ</sup><br>A: 95.3 [93.0, 97.6] <sup>δ</sup> | -1.6<br>(NS)  | +0.37<br>(NS) |  |
|                                            |                      |                                 |                                                      |      |     |                  |                                                                        |                                                 |                                                                         |               |               |  |
|                                            |                      |                                 |                                                      |      |     |                  |                                                                        |                                                 |                                                                         |               |               |  |
|                                            |                      |                                 |                                                      |      |     |                  |                                                                        |                                                 |                                                                         |               |               |  |
|                                            |                      | Placebo (18)<br>Treated (21)    |                                                      |      |     | Insulin (μIU/mL) | B: 12.0 ± 4.6<br>A: 8.4 ± 3.8                                          | -3.6<br>(NS)                                    | B: 8.8 ± 3.4<br>A: 7.4 ± 2.8                                            | -1.4<br>(NS)  | +2.2<br>(NS)  |  |
|                                            |                      |                                 |                                                      |      |     |                  |                                                                        |                                                 |                                                                         |               |               |  |
|                                            |                      |                                 |                                                      |      |     |                  |                                                                        |                                                 |                                                                         |               |               |  |
|                                            |                      |                                 |                                                      |      |     |                  |                                                                        |                                                 |                                                                         |               |               |  |
|                                            |                      | Placebo (120)<br>Treated (117)  |                                                      |      |     | HOMA-IR          | B: 1.4 ± 0.61<br>A: 1.1 ± 0.76                                         | -0.26<br>(NS)                                   | B: 1.0 ± 0.45<br>A: 0.98 ± 0.78                                         | -0.02<br>(NS) | +0.24<br>(NS) |  |
|                                            |                      |                                 |                                                      |      |     |                  |                                                                        |                                                 |                                                                         |               |               |  |
|                                            |                      |                                 |                                                      |      |     |                  |                                                                        |                                                 |                                                                         |               |               |  |
|                                            |                      |                                 |                                                      |      |     |                  |                                                                        |                                                 |                                                                         |               |               |  |
|                                            |                      |                                 |                                                      |      |     | Glucose (mg/dL)  | B: 97.3 [95.0, 99.7] <sup>δ</sup><br>A: 94.7 [92.5, 97.0] <sup>δ</sup> | -1.9<br>(NS)                                    | B: 97.6 [95.3, 100.0] <sup>δ</sup><br>A: 95.3 [93.0, 97.6] <sup>δ</sup> | -1.6<br>(NS)  | +0.37<br>(NS) |  |
|                                            |                      |                                 |                                                      |      |     |                  |                                                                        |                                                 |                                                                         |               |               |  |
|                                            |                      |                                 |                                                      |      |     |                  |                                                                        |                                                 |                                                                         |               |               |  |
|                                            |                      |                                 |                                                      |      |     |                  |                                                                        |                                                 |                                                                         |               |               |  |
|                                            |                      |                                 |                                                      |      |     | Insulin (μIU/mL) | B: 6.2 [5.7, 6.9] <sup>δ</sup><br>A: 6.6 [6.0, 7.3] <sup>δ</sup>       | +0.29<br>(NS)                                   | B: 6.7 [6.05, 7.31] <sup>δ</sup><br>A: 6.9 [6.33, 7.65] <sup>δ</sup>    | +0.31<br>(NS) | +0.02<br>(NS) |  |
|                                            |                      |                                 |                                                      |      |     |                  |                                                                        |                                                 |                                                                         |               |               |  |
|                                            |                      |                                 |                                                      |      |     |                  |                                                                        |                                                 |                                                                         |               |               |  |
|                                            |                      |                                 |                                                      |      |     |                  |                                                                        |                                                 |                                                                         |               |               |  |
|                                            |                      |                                 |                                                      |      |     | HOMA-IR          | B: 1.5 [1.4, 1.7] <sup>δ</sup><br>A: 1.6 [1.4, 1.7] <sup>δ</sup>       | +0.05<br>(NS)                                   | B: 1.6 [1.5, 1.8] <sup>δ</sup><br>A: 1.6 [1.5, 1.8] <sup>δ</sup>        | +0.07<br>(NS) | +0.02<br>(NS) |  |
|                                            |                      |                                 |                                                      |      |     |                  |                                                                        |                                                 |                                                                         |               |               |  |
|                                            |                      |                                 |                                                      |      |     |                  |                                                                        |                                                 |                                                                         |               |               |  |
|                                            |                      |                                 |                                                      |      |     |                  |                                                                        |                                                 |                                                                         |               |               |  |

Data are presented as the mean ± SD unless otherwise stated; HOMA-IR: Homeostatic Model Assessment of insulin resistance; <sup>δ</sup>: geometric mean [95% Confidence intervals]; B: Before intervention; A: After intervention; NS: Not significant; NI: Not indicated; C: Control; T: Treated; P: Placebo; EGCG: Epigallocatechin gallate; EC: Epicatechin; EGC: Epigallocatechin; ECG: Epicatechin gallate; GCG: Gallocatechin gallate; AB: Alcoholic beer; NAB: Dealcoholized beer; DRW: Dealcoholized red wine; RW: Red wine; **numbers in bold** are the changes estimated as the mean difference: (A) after – (B) before (intra-group) or treated – control or placebo or comparator (between groups); \*The units used by authors were not the most common ones and the transformation to conventional or standardized units (μIU/mL) resulted in incongruent results.

**Table S4.** Changes in total cholesterol as reported in human RCTs (parallel or crossover design) looking at the chronic effects of (poly)phenol-containing products in postmenopausal women, without hormone replacement therapy or lipid-lowering therapy.

| References                       | Health status | Treatment Groups<br>(N participants per group)                                                          | (Poly)phenols                                                                                            | Dose<br>(poly)phenols<br>(mg /d) | Duration<br>(d) | Total circulating cholesterol (mg/dL) |                        |                                                                              |                                  |                                                 |
|----------------------------------|---------------|---------------------------------------------------------------------------------------------------------|----------------------------------------------------------------------------------------------------------|----------------------------------|-----------------|---------------------------------------|------------------------|------------------------------------------------------------------------------|----------------------------------|-------------------------------------------------|
|                                  |               |                                                                                                         |                                                                                                          |                                  |                 | Control/Placebo/<br>Comparator        | Δ (A – B)<br>(p-value) | Treatment                                                                    | Δ (A – B)<br>(p-value)           | Δ (Treatment –<br>Control/Placebo)<br>(p-value) |
| Cheng et al.,<br>2004 [36]       | Healthy       | Capsules                                                                                                | Isoflavones (daidzein<br>and genistein) in<br>evening primrose oil                                       | 100                              | 90<br><br>180   | B: 214.6 ± 27.4                       | <b>+11.2</b>           | B: 197.2 ± 32.0                                                              | <b>+15.1</b>                     | <b>+3.9</b>                                     |
|                                  |               |                                                                                                         |                                                                                                          |                                  |                 | A90: 225.8 ± 38.2                     | <b>+5.0</b>            | A90: 212.3 ± 32.8                                                            | <b>+10.4</b>                     | <b>+5.4</b>                                     |
|                                  |               | Estrogen (11)<br>Isoflavone (17)                                                                        |                                                                                                          |                                  |                 | A180: 219.6 ± 36.6                    | (NS)                   | A180: 207.6 ± 32.4                                                           | (NS)                             | (NS)                                            |
| Sathyapalan et<br>al., 2018 [37] | Healthy       | Snack bars (soy protein free<br>isoflavones or with<br>isoflavones)                                     | Mix isoflavones                                                                                          | 66                               | 180             | B: 223.9 ± 30.9                       | -3.9                   | B: 223.9 ± 34.7                                                              | 0.0                              | +3.9                                            |
|                                  |               |                                                                                                         |                                                                                                          |                                  |                 | A: 220.0 ± 30.9                       | (NS)                   | A: 223.9 ± 34.7                                                              | (NS)                             | (NS)                                            |
|                                  |               | Placebo (60)<br>Treated (60)                                                                            |                                                                                                          |                                  |                 |                                       |                        |                                                                              |                                  |                                                 |
| Myasoedova et<br>al., 2016 [35]  | Healthy       | Mixed herbs capsules (500<br>mg of mix grape seeds, green<br>tea leaves, hop cone and<br>garlic powder) | Mix (poly)phenols<br>(procyanidin, genistein,<br>daidzein, flavones,<br>resveratrol, other<br>phenolics) | 283                              | 365             | B: 252.0 ± 42.0                       | -13.0                  | B: 271.0 ± 55.0                                                              | -17.0                            | <b>-4.0</b>                                     |
|                                  |               |                                                                                                         |                                                                                                          |                                  |                 | A: NI                                 | (0.020)                | A: NI                                                                        | (0.010)                          | (NS)                                            |
|                                  |               | Placebo (71)<br>Treated ×3 capsules/d (56)                                                              |                                                                                                          |                                  |                 |                                       |                        |                                                                              |                                  |                                                 |
| Wu et al., 2012<br>[38]          | Healthy       | Green tea extract capsules<br>(G)                                                                       | Mix (poly)phenols<br>(mostly EGCG plus EC,<br>EGC, ECG, and GCG)                                         | T1: 400<br>T2: 800               | 60              |                                       |                        | <b>T1: Group G400</b>                                                        | <b>G400</b>                      | <b>Group G400 vs P</b>                          |
|                                  |               |                                                                                                         |                                                                                                          |                                  |                 | B: 216.0 [203.0, 231.0] <sup>§</sup>  | <b>0.0</b>             | B: 218.0 [205.0, 231.0] <sup>§</sup>                                         | <b>-11.0</b>                     | <b>-11.0</b>                                    |
|                                  |               |                                                                                                         |                                                                                                          |                                  |                 | A: 216.0 [203.0, 229.0] <sup>§</sup>  | (NS)                   | A: 207.0 [196.0, 219.0] <sup>§</sup>                                         | (0.012)                          | (0.072)                                         |
|                                  |               | Placebo (32)                                                                                            |                                                                                                          |                                  |                 |                                       |                        | <b>T2: Group G800</b>                                                        | <b>G800</b>                      | <b>Group G800 vs P</b>                          |
|                                  |               | T1: Group G400 (37)<br>T2: Group G800 (34)                                                              |                                                                                                          |                                  |                 |                                       |                        | B: 208.0 [195.0, 221.0] <sup>§</sup><br>A: 202.0 [190.0, 214.0] <sup>§</sup> | <b>-6.0</b><br>(0.045)           | <b>-6.0</b><br>(0.072)                          |
|                                  |               |                                                                                                         |                                                                                                          |                                  |                 |                                       |                        |                                                                              | <b>Groups vs P</b><br>NI<br>(NS) |                                                 |
|                                  |               |                                                                                                         |                                                                                                          |                                  |                 |                                       |                        |                                                                              |                                  | <b>Group G800 vs G400</b><br><b>+5.0</b>        |

|                                    |         |                                                   |                                                                                    |         |     |                                    |               |                                    |              |                        |  |
|------------------------------------|---------|---------------------------------------------------|------------------------------------------------------------------------------------|---------|-----|------------------------------------|---------------|------------------------------------|--------------|------------------------|--|
| (NS)                               |         |                                                   |                                                                                    |         |     |                                    |               |                                    |              |                        |  |
| Curtis et al., 2009 [39]           | Healthy | Elderberry extract capsules (125 mg)              | Mix anthocyanins (mostly cyanidin-3-glucoside) per capsule                         | 500     | 84  | B: 212.3 ± 23.2<br>A: 204.6 ± 34.7 | -7.7<br>(NS)  | B: 208.4 ± 27.0<br>A: 212.3 ± 27.0 | +3.9<br>(NS) | +11.6<br>(NS)          |  |
|                                    |         | Placebo (26)<br>Treated (26)                      |                                                                                    |         |     |                                    |               |                                    |              |                        |  |
| Zern et al., 2005 [40]             | Healthy | Lyophilized grape powder                          | Mix (poly)phenols (anthocyanins, quercetin, myricetin, kaempferol and resveratrol) | ~210    | 28  | B: 216.2 ± 38.6<br>A: 223.9 ± 42.5 | +7.7<br>(NS)  | B: 216.2 ± 38.6<br>A: 220.0 ± 42.5 | +3.9<br>(NS) | -3.9<br>(NS)           |  |
|                                    |         | Placebo (20)<br>Treated (20)                      |                                                                                    |         |     |                                    |               |                                    |              |                        |  |
| Chai et al., 2012 [41]             | Healthy | Dried plum or dried apple                         | Mix (poly)phenols                                                                  | NI      | 90  | T1: Group DP                       |               | T2: Group DA                       |              | Group DA vs DP         |  |
|                                    |         |                                                   |                                                                                    |         | 180 | B: 189.5 ± 91.0                    | -3.9          | B: 196.9 ± 70.0                    | -20.1        | -16.2                  |  |
|                                    |         | T1: Group DP (55)                                 |                                                                                    |         | 365 | A90: 185.7 ± 82.0                  | -3.9          | A90: 176.8 ± 53.0                  | -26.3        | -22.4                  |  |
|                                    |         | T2: Group DA (45)                                 |                                                                                    |         |     | A180: 185.7 ± 85.0                 | -6.9          | A180: 170.6 ± 56.0                 | -27.4        | -20.5                  |  |
|                                    |         |                                                   |                                                                                    |         |     | A365: 182.6 ± 85.0                 | (NS)          | A365: 169.5 ± 83.0                 | (0.002)      | (365d)<br>( $<0.050$ ) |  |
| Al-Dashi et al., 2019 [34]         | Healthy | Prunes                                            | Mix (poly)phenols (chlorogenic, neochlorogenic acids, others)                      | NI      | 14  | T1: Low dose                       |               | T2: High dose                      |              | High vs Low            |  |
|                                    |         |                                                   |                                                                                    |         |     | B: 213.0 <sup>δ</sup> ± 43.0       | -5.0          | B: 209.0 <sup>δ</sup> ± 37.0       | -0.60        | +5.0                   |  |
|                                    |         | T1: Low dose 14 g (27)<br>T2: High dose 42 g (27) |                                                                                    |         |     | A: 208.0 <sup>δ</sup> ± 34.0       | (NS)          | A: 208.0 <sup>δ</sup> ± 33.0       | (NS)         | (NS)                   |  |
| García-Yu et al., 2020 [42]        | Healthy | 10g of dark chocolate (99% cocoa)                 | Flavanols                                                                          | 65      | 180 | B: 204.0 ± 26.6<br>A: 205.0 ± 30.2 | +0.90<br>(NS) | B: 211.0 ± 28.5<br>A: 212.0 ± 34.6 | +1.3<br>(NS) | +0.44<br>(NS)          |  |
|                                    |         | Control (66)<br>Treated (71)                      |                                                                                    |         |     |                                    |               |                                    |              |                        |  |
| Estévez-Santiago et al., 2019 [44] | Healthy | Capsules                                          | T1: Xanthophylls (lutein + zeaxanthin)                                             | T1: 8.0 | 120 | T1: Group X                        |               | T2: Group A                        |              | Group A vs X           |  |
|                                    |         |                                                   |                                                                                    | T2: 60  | 240 | B: 210.4 ± 26.6                    | NI            | B: 208.8 ± 38.6                    | NI           | NI                     |  |
|                                    |         | T1: Group X (26)                                  | T2: Anthocyanins                                                                   | T3: 68  |     | A120: NI                           | NI            | A120: NI                           | NI           | NI                     |  |
|                                    |         | T2: Group A (23)                                  | T3: Anthocyanins and xanthophylls (lutein + zeaxanthin)                            |         |     | A240: NI                           | (NS)          | A240: NI                           | (NS)         | (NS)                   |  |
|                                    |         | T3: Group A+X (23)                                |                                                                                    |         |     |                                    |               | T3: Group A+X                      |              | Group A+X vs X         |  |
|                                    |         |                                                   |                                                                                    |         |     |                                    |               | B: 221.9 ± 22.4                    | NI           | NI                     |  |
|                                    |         |                                                   |                                                                                    |         |     |                                    |               | A120: NI                           | NI           | NI                     |  |
|                                    |         |                                                   |                                                                                    |         |     |                                    |               | A240: NI                           | (NS)         | (NS)                   |  |

|                                  |                                  |                                                                                                                                                                                   |                        |     |                                              |              |                   |  |               |                        |  |                       |
|----------------------------------|----------------------------------|-----------------------------------------------------------------------------------------------------------------------------------------------------------------------------------|------------------------|-----|----------------------------------------------|--------------|-------------------|--|---------------|------------------------|--|-----------------------|
|                                  |                                  |                                                                                                                                                                                   |                        |     |                                              |              |                   |  |               |                        |  | Group A+X <i>vs</i> A |
|                                  |                                  |                                                                                                                                                                                   |                        |     |                                              |              |                   |  |               |                        |  | NI                    |
|                                  |                                  |                                                                                                                                                                                   |                        |     |                                              |              |                   |  |               |                        |  | NI                    |
|                                  |                                  |                                                                                                                                                                                   |                        |     |                                              |              |                   |  |               |                        |  | (NS)                  |
| Trius-Soler et al., 2021 [32]    | Healthy                          | Beer beverage with and Prenylflavonoids without alcohol Control (14)<br>T1: Group AB (16)<br>T2: Group NAB (7)                                                                    | T1: 0.359<br>T2: 0.259 | 180 | B: 185.0 ± 30.0<br>A: NI                     | NI<br>(NS)   | T1: Group AB      |  | NI<br>(NS)    | Group AB <i>vs</i> C   |  |                       |
|                                  |                                  |                                                                                                                                                                                   |                        |     |                                              |              | B: 206.0 ± 22.0   |  |               | -6.0                   |  |                       |
|                                  |                                  |                                                                                                                                                                                   |                        |     |                                              |              | A: NI             |  |               | (NS)                   |  |                       |
|                                  |                                  |                                                                                                                                                                                   |                        |     |                                              |              | T2: Group NAB     |  | NI<br>(NS)    | Group NAB <i>vs</i> C  |  |                       |
|                                  |                                  |                                                                                                                                                                                   |                        |     |                                              |              | B: 208.0 ± 27.0   |  |               | -10.0                  |  |                       |
|                                  |                                  |                                                                                                                                                                                   |                        |     |                                              |              | A: NI             |  |               | (NS)                   |  |                       |
|                                  |                                  |                                                                                                                                                                                   |                        |     |                                              |              |                   |  |               | Groups <i>vs</i> C     |  |                       |
|                                  |                                  |                                                                                                                                                                                   |                        |     |                                              |              |                   |  |               | NI                     |  |                       |
|                                  |                                  |                                                                                                                                                                                   |                        |     |                                              |              |                   |  |               | (NS)                   |  |                       |
|                                  |                                  |                                                                                                                                                                                   |                        |     |                                              |              |                   |  |               | Group NAB <i>vs</i> AB |  |                       |
|                                  |                                  |                                                                                                                                                                                   |                        |     |                                              |              |                   |  |               | -4.0                   |  |                       |
|                                  |                                  |                                                                                                                                                                                   |                        |     |                                              |              |                   |  |               | (NS)                   |  |                       |
| Wang-Polagruto et al., 2006 [25] | Dyslipidaemia (high cholesterol) | Flavanol cocoa beverage T1: Low flavanol (16)<br>T2: High flavanol (16)                                                                                                           | T1: 43<br>T2: 446      | 42  | T1: Low flavanol<br>B: 240.0 ± 32.0<br>A: NI | NI<br>(NS)   | T2: High flavanol |  | NI<br>(NS)    | High <i>vs</i> Low     |  |                       |
|                                  |                                  |                                                                                                                                                                                   |                        |     |                                              |              | B: 235.0 ± 32.0   |  |               | NI                     |  |                       |
|                                  |                                  |                                                                                                                                                                                   |                        |     |                                              |              | A: NI             |  | (NS)          |                        |  |                       |
| Naissides et al., 2006b [27]     | Dyslipidaemia (high cholesterol) | Red wine RW (2.5 g Mix (poly)phenols (poly)phenols/L)<br><br>Control (400 mL water) (16)<br><br>T1: Group DRW alcohol (400 mL) (15)<br><br>T2: Group RW non-alcohol (400 mL) (14) | 1000                   | 42  | B: 238.2 ± 23.0<br>A: 242.8 ± 23.0           | +4.6<br>(NS) | T1: Group DRW     |  | -3.1<br>(NS)  | Group DRW <i>vs</i> C  |  |                       |
|                                  |                                  |                                                                                                                                                                                   |                        |     |                                              |              | B: 242.0 ± 39.0   |  |               | -7.7                   |  |                       |
|                                  |                                  |                                                                                                                                                                                   |                        |     |                                              |              | A: 238.9 ± 48.0   |  |               | (NS)                   |  |                       |
|                                  |                                  |                                                                                                                                                                                   |                        |     |                                              |              | T2: Group RW      |  | -0.38<br>(NS) | Group RW <i>vs</i> C   |  |                       |
|                                  |                                  |                                                                                                                                                                                   |                        |     |                                              |              | B: 241.6 ± 20.0   |  |               | -5.0                   |  |                       |
|                                  |                                  |                                                                                                                                                                                   |                        |     |                                              |              | A: 241.3 ± 25.0   |  |               | (NS)                   |  |                       |
|                                  |                                  |                                                                                                                                                                                   |                        |     |                                              |              |                   |  |               | Groups <i>vs</i> C     |  |                       |
|                                  |                                  |                                                                                                                                                                                   |                        |     |                                              |              |                   |  |               | NI                     |  |                       |
|                                  |                                  |                                                                                                                                                                                   |                        |     |                                              |              |                   |  |               | (NS)                   |  |                       |
|                                  |                                  |                                                                                                                                                                                   |                        |     |                                              |              |                   |  |               | Group DRW <i>vs</i> RW |  |                       |
|                                  |                                  |                                                                                                                                                                                   |                        |     |                                              |              |                   |  |               | -2.7                   |  |                       |
|                                  |                                  |                                                                                                                                                                                   |                        |     |                                              |              |                   |  |               | (NS)                   |  |                       |

|                                            |                                     |                                                          |                                                      |            |     |                                          |                            |                                          |                            |                      |
|--------------------------------------------|-------------------------------------|----------------------------------------------------------|------------------------------------------------------|------------|-----|------------------------------------------|----------------------------|------------------------------------------|----------------------------|----------------------|
| <b>Aubertin-Leheudre et al., 2008 [45]</b> | Obese                               | Soybeans capsules (17.5 mg)                              | Mix isoflavones (daidzein, glycitein, and genistein) | 70         | 180 | B: 205.7 ± 32.0<br>A: 218.5 ± 28.2       | <b>+12.7</b><br>(NS)       | B: 208.8 ± 33.9<br>A: 201.9 ± 27.8       | <b>-6.9</b><br>(NS)        | <b>-19.7</b><br>(NS) |
|                                            |                                     | Placebo (18)<br>Treated (21)                             |                                                      |            |     |                                          |                            |                                          |                            |                      |
| <b>Filip et al., 2015 [28]</b>             | Osteopenia (mix cholesterol levels) | Olive leaf extract                                       | Mix (poly)phenols (>40% oleuropein)                  | >100       | 180 | B: 249.1 ± 35.1                          | -28.4                      | B: 236.2 ± 51.9                          | -17.2                      | +11.2                |
|                                            |                                     | Placebo (400 mg Ca capsules) (21)                        |                                                      | oleuropein | 365 | A180: 220.7 ± 32.5<br>A365: 233.4 ± 32.6 | -15.7<br>(365d)<br>(0.010) | A180: 219.0 ± 41.3<br>A365: 209.9 ± 35.5 | -26.2<br>(365d)<br>(0.010) | -10.5<br>(NS)        |
|                                            |                                     | Treated (400 mg Ca + 250 mg olive extract capsules) (27) |                                                      |            |     |                                          |                            |                                          |                            |                      |

**Table S5.** Changes in LDL-cholesterol as reported in human randomized clinical trials (RCTs, parallel or crossover design) looking at the effects of (poly)phenol-containing products in postmenopausal women, without hormone replacement therapy or lipid-lowering therapy.

|                                     |         |                                                                                                |                                                                                              |                    |                  |                                                                                                      |                                                   |                                                                                                       |                                                         |                                                                               |
|-------------------------------------|---------|------------------------------------------------------------------------------------------------|----------------------------------------------------------------------------------------------|--------------------|------------------|------------------------------------------------------------------------------------------------------|---------------------------------------------------|-------------------------------------------------------------------------------------------------------|---------------------------------------------------------|-------------------------------------------------------------------------------|
| <b>Myasoedova et al., 2016 [35]</b> | Healthy | Mixed herbs capsules (500 mg of mix grape seeds, green tea leaves, hop cone and garlic powder) | Mix (poly)phenols (procyanidin, genistein, daidzein, flavones, resveratrol, other phenolics) | 283                | 365              | B: 153.0 ± 42.0<br>A: NI                                                                             | -8.0<br>(NS)                                      | B: 170.0 ± 47.0<br>A: NI                                                                              | -13.0<br>(0.040)                                        | -5.0<br>(NS)                                                                  |
|                                     |         | Placebo (71)<br>Treated ×3 capsules/d (56)                                                     |                                                                                              |                    |                  |                                                                                                      |                                                   |                                                                                                       |                                                         |                                                                               |
| <b>Wu et al., 2012 [38]</b>         | Healthy | Green tea extract capsules                                                                     | Mix (poly)phenols (mostly EGCG plus EC, EGC, ECG, and GCG)                                   | T1: 400<br>T2: 800 | 60               | B: 127.0 [114.0, 142.0] <sup>§</sup><br>A: 128.0 [116.0, 141.0] <sup>§</sup>                         | <b>+1.0</b><br>(NS)                               | <b>T1: Group G400</b><br>B: 129.0 [117.0, 143.0] <sup>§</sup><br>A: 119.0 [109.0, 130.0] <sup>§</sup> | <b>G400</b><br><b>-10.0</b><br>(0.007)                  | <b>Group G400 vs P</b><br><b>-11.0</b><br>(0.021)                             |
|                                     |         | Placebo (32)<br>T1: Group G400 (37)<br>T2: Group G800 (34)                                     |                                                                                              |                    |                  |                                                                                                      |                                                   | <b>T2: Group G800</b><br>B: 122.0 [110.0, 136.0] <sup>§</sup><br>A: 114.0 [104.0, 126.0] <sup>§</sup> | <b>G800</b><br><b>-8.0</b><br>(0.012)                   | <b>Group G800 vs P</b><br><b>-9.0</b><br>(0.021)                              |
|                                     |         |                                                                                                |                                                                                              |                    |                  |                                                                                                      |                                                   |                                                                                                       |                                                         | <b>Groups vs P</b><br>NI<br>(NS)                                              |
|                                     |         |                                                                                                |                                                                                              |                    |                  |                                                                                                      |                                                   |                                                                                                       |                                                         | <b>Group G800 vs G400</b><br><b>+2.0</b><br>(NS)                              |
| <b>Curtis et al., 2009 [39]</b>     | Healthy | Elderberry extract capsules (125 mg)                                                           | Mix anthocyanins (mostly cyanidin-3-glucoside) per capsule                                   | 500                | 84               | B: 135.1 ± 23.2<br>A: 127.4 ± 30.9                                                                   | -7.7<br>(NS)                                      | B: 131.2 ± 23.2<br>A: 131.2 ± 27.0                                                                    | <b>0.0</b><br>(NS)                                      | <b>+7.7</b><br>(NS)                                                           |
|                                     |         | Placebo (26)<br>Treated (26)                                                                   |                                                                                              |                    |                  |                                                                                                      |                                                   |                                                                                                       |                                                         |                                                                               |
| <b>Zern et al., 2005 [40]</b>       | Healthy | Lyophilized grape powder                                                                       | Mix grape (poly)phenols (anthocyanins, quercetin, myricetin, kaempferol and resveratrol)     | ~210               | 28               | B: 111.9 ± 33.6<br>A: 108.1 ± 31.7                                                                   | -3.9<br>(NS)                                      | B: 111.9 ± 33.6<br>A: 104.2 ± 35.5                                                                    | -7.7<br>(NS)                                            | -3.9<br>(<0.050)                                                              |
|                                     |         | Placebo (20)<br>Treated (20)                                                                   |                                                                                              |                    |                  |                                                                                                      |                                                   |                                                                                                       |                                                         |                                                                               |
| <b>Chai et al., 2012 [41]</b>       | Healthy | Dried plum or dried apple                                                                      | Mix (poly)phenols                                                                            | NI                 | 90<br>180<br>365 | <b>T1: Group DP</b><br>B: 100.4 ± 87.0<br>A90: 96.5 ± 69.0<br>A180: 97.3 ± 78.0<br>A365: 93.4 ± 78.0 | <b>-3.9</b><br><b>-3.1</b><br><b>-6.9</b><br>(NS) | <b>T2: Group DA</b><br>B: 110.4 ± 70.0<br>A90: 93.4 ± 55.0<br>A180: 83.4 ± 55.0<br>A365: 85.3 ± 78.0  | <b>-16.9</b><br><b>-27.0</b><br><b>-25.1</b><br>(0.002) | <b>Group DA vs DP</b><br><b>-13.1</b><br><b>-23.9</b><br><b>-18.1</b><br>(NS) |

|                                    |         |                                                            |                                                                            |                             |            |                                                               |                  |                                                                 |                  |                                           |
|------------------------------------|---------|------------------------------------------------------------|----------------------------------------------------------------------------|-----------------------------|------------|---------------------------------------------------------------|------------------|-----------------------------------------------------------------|------------------|-------------------------------------------|
| Al-Dashi et al., 2019 [34]         | Healthy | Prunes                                                     | Mix (poly)phenols (chlorogenic, neochlorogenic acids, others)              | NI                          | 14         | B: 127.0 <sup>δ</sup> ± 37.0<br>A: 126.0 <sup>δ</sup> ± 34.0  | -0.60<br>(NS)    | B: 128.0 <sup>δ</sup> ± 37.0<br>A: 128.0 <sup>δ</sup> ± 31.0    | -0.10<br>(NS)    | +0.50<br>(NS)                             |
|                                    |         | T1: Low dose 14 g (27)<br>T2: High dose 42 g (27)          |                                                                            |                             |            |                                                               |                  |                                                                 |                  |                                           |
| García-Yu et al., 2020 [42]        | Healthy | 10g of dark chocolate (99% cocoa)                          | Flavanols                                                                  | 65                          | 180        | B: 122.0 ± 26.9<br>A: 124.0 ± 29.3                            | +1.6<br>(NS)     | B: 128.0 ± 26.4<br>A: 130.0 ± 29.1                              | +2.7<br>(NS)     | +1.5<br>(NS)                              |
|                                    |         | Control (66)<br>Treated (71)                               |                                                                            |                             |            |                                                               |                  |                                                                 |                  |                                           |
| Estévez-Santiago et al., 2019 [44] | Healthy | Capsules                                                   | T1: Xanthophylls (lutein+zeaxanthin )                                      | T1: 8.0<br>T2: 60<br>T3: 68 | 120<br>240 | <b>T1: Group X</b><br>B: 143.9 ± 29.7<br>A120: NI<br>A240: NI | NI<br>NI<br>(NS) | <b>T2: Group A</b><br>B: 145.5 ± 42.5<br>A120: NI<br>A240: NI   | NI<br>NI<br>(NS) | <b>Group A vs X</b><br>NI<br>NI<br>(NS)   |
|                                    |         | T1: Group X (26)<br>T2: Group A (23)<br>T3: Group A+X (23) | T2: Anthocyanins<br>T3: Anthocyanins and xanthophylls (lutein+zeaxanthin ) |                             |            |                                                               |                  | <b>T3: Group A+X</b><br>B: 150.9 ± 23.5<br>A120: NI<br>A240: NI | NI<br>NI<br>(NS) | <b>Group A+X vs X</b><br>NI<br>NI<br>(NS) |
|                                    |         |                                                            |                                                                            |                             |            |                                                               |                  |                                                                 |                  | <b>Group A+X vs A</b><br>NI<br>NI<br>(NS) |
|                                    |         |                                                            |                                                                            |                             |            |                                                               |                  |                                                                 |                  |                                           |
|                                    |         |                                                            |                                                                            |                             |            |                                                               |                  |                                                                 |                  |                                           |
|                                    |         |                                                            |                                                                            |                             |            |                                                               |                  |                                                                 |                  |                                           |
| Trius-Soler et al., 2021 [32]      | Healthy | Beer beverage with and without alcohol                     | Prenylflavonoids                                                           | T1: 0.359<br>T2: 0.259      | 180        | B: 114.0 ± 23.0<br>A: NI                                      | NI<br>(NS)       | <b>T1: Group AB</b><br>B: 135.0 ± 25.0<br>A: NI                 | NI<br>(NS)       | <b>Group AB vs C</b><br>-12.8<br>(NS)     |
|                                    |         | Control (14)<br>T1: Group AB (16)<br>T2: Group NAB (7)     |                                                                            |                             |            |                                                               |                  | <b>T2: Group NAB</b><br>B: 142.0 ± 18.0<br>A: NI                | NI<br>(NS)       | <b>Group NAB vs C</b><br>-16.1<br>(0.016) |
|                                    |         |                                                            |                                                                            |                             |            |                                                               |                  |                                                                 |                  | <b>Groups vs C</b><br>NI<br>(NS)          |
|                                    |         |                                                            |                                                                            |                             |            |                                                               |                  |                                                                 |                  | <b>Group NAB vs AB</b><br>-3.3<br>(NS)    |



|                                            |                                     |                                                          |                                                      |                    |            |                                                             |                                  |                                                             |                                  |                                                     |
|--------------------------------------------|-------------------------------------|----------------------------------------------------------|------------------------------------------------------|--------------------|------------|-------------------------------------------------------------|----------------------------------|-------------------------------------------------------------|----------------------------------|-----------------------------------------------------|
| <b>Wang-Polagruto et al., 2006 [25]</b>    | Dyslipidaemia (high cholesterol)    | Flavanol cocoa beverage                                  | Mix flavanols                                        | T1: 43<br>T2: 446  | 42         | <b>T1: Low flavanol</b><br>B: 150.0 ± 36.0<br>A: NI         | NI<br>(NS)                       | <b>T2: High flavanol</b><br>B: 149.0 ± 20.0<br>A: NI        | NI<br>(NS)                       | <b>High vs Low</b><br>NI<br>(NS)                    |
| <b>Naissides et al., 2006b [27]</b>        | Dyslipidaemia (high cholesterol)    | Red wine RW (2.5 g (poly)phenols/L)                      | Mix (poly)phenols                                    | 1000               | 42         | NI<br>(NS)                                                  | NI<br>(NS)                       | <b>T1: Group DRW</b><br>B: NI<br>A: NI                      | <b>DRW</b><br>+0.13‡<br>(NS)     | <b>Group DRW vs C</b><br><b>-0.40</b><br>(NS)       |
|                                            |                                     | Control (400 mL water) (16)                              |                                                      |                    |            |                                                             |                                  | <b>T2: Group RW</b><br>B: NI<br>A: NI                       | <b>RW</b><br>-8.0‡<br>(NS)       | <b>Group RW vs C</b><br><b>-9.0</b><br>( $<0.050$ ) |
|                                            |                                     | T1: Group DRW non-alcohol (400 mL) (15)                  |                                                      |                    |            |                                                             |                                  |                                                             |                                  |                                                     |
|                                            |                                     | T2: Group RW alcohol (400 mL) (14)                       |                                                      |                    |            |                                                             |                                  |                                                             |                                  | <b>Groups vs C</b><br>NI<br>(NS)                    |
| <b>Aubertin-Leheudre et al., 2008 [45]</b> | Obese                               | Soybeans capsules (17.5 mg)                              | Mix isoflavones (daidzein, glycitein, and genistein) | 70                 | 180        | B: 122.4 ± 30.1<br>A: 134.3 ± 25.1                          | <b>-11.9</b><br>(NS)             | B: 122.4 ± 31.3<br>A: 122.4 ± 26.6                          | <b>0.0</b><br>(NS)               | <b>+11.9</b><br>(NS)                                |
|                                            |                                     | Placebo (18)<br>Treated (21)                             |                                                      |                    |            |                                                             |                                  |                                                             |                                  |                                                     |
| <b>Filip et al., 2015 [28]</b>             | Osteopenia (mix cholesterol levels) | Olive leaf extract                                       | Mix (poly)phenols (>40% oleuropein)                  | >100<br>oleuropein | 180<br>365 | B: 174.4 ± 37.6<br>A180: 143.4 ± 30.0<br>A365: 154.1 ± 30.5 | <b>-30.9</b><br>-20.4<br>(0.020) | B: 167.2 ± 51.2<br>A180: 145.5 ± 38.6<br>A365: 132.5 ± 29.7 | <b>-21.7</b><br>-34.7<br>(0.020) | <b>+9.3</b><br><b>+14.3</b><br>(NS)                 |
|                                            |                                     | Placebo (400 mg Ca capsules) (21)                        |                                                      |                    |            |                                                             |                                  |                                                             |                                  |                                                     |
|                                            |                                     | Treated (400 mg Ca + 250 mg olive extract capsules) (27) |                                                      |                    |            |                                                             |                                  |                                                             |                                  |                                                     |

Data are presented as the mean ± SD unless otherwise stated; B: Before intervention; A: After intervention; NS: Not significant; NI: Not indicated; C: Control; T: Treated; P: Placebo; EGCG: Epigallocatechin gallate; EC: Epicatechin; EGC: Epigallocatechin; ECG: Epicatechin gallate; GCG: Gallocatechin gallate; DP: Dried plum; DA: Dried apple; AB: Alcoholic beer; NAB: Dealcoholized beer; DRW: Dealcoholized red wine; RW: Red wine; Ca: Calcium; †: % change reported by the authors; ‡: geometric mean [95% CI]; **numbers in bold** are the changes estimated as the mean difference: (A) after – (B) before (intra-group) or treated – control or placebo or comparator (between groups).

**Table S6.** Changes in HDL as reported in human RCTs (parallel or crossover design) looking at the chronic effects of (poly)phenol-containing products in postmenopausal women, without hormone replacement therapy or lipid-lowering therapy.

[illegible]

|                                           |         |                                                                            |                                                                                                                   |                             |                  |                                                                                                     |                                                  |                                                                                                                                    |                                                  |                                                                                                                                           |
|-------------------------------------------|---------|----------------------------------------------------------------------------|-------------------------------------------------------------------------------------------------------------------|-----------------------------|------------------|-----------------------------------------------------------------------------------------------------|--------------------------------------------------|------------------------------------------------------------------------------------------------------------------------------------|--------------------------------------------------|-------------------------------------------------------------------------------------------------------------------------------------------|
| <b>Curtis et al., 2009 [39]</b>           | Healthy | Elderberry extract capsules (125 mg)<br>Placebo (26)<br>Treated (26)       | Mix anthocyanins (mostly cyanidin-3-glucoside) per capsule                                                        | 500                         | 84               | B: 61.8 ± 11.6<br>A: 61.8 ± 11.6                                                                    | <b>0.0</b><br>(NS)                               | B: 61.8 ± 15.4<br>A: 61.8 ± 15.4                                                                                                   | <b>0.0</b><br>(NS)                               | <b>0.0</b><br>(NS)                                                                                                                        |
| <b>Zern et al., 2005 [40]</b>             | Healthy | Lyophilized grape powder<br><br>Placebo (20)<br>Treated (20)               | Mix grape (poly)phenols (anthocyanins, quercetin, myricetin, kaempferol and resveratrol)                          | ~210                        | 28               | B: 69.5 ± 13.5<br>A: 73.3 ± 14.3                                                                    | <b>+3.9</b><br>(NS)                              | B: 69.5 ± 13.5<br>A: 73.3 ± 13.1                                                                                                   | <b>+3.9</b><br>(NS)                              | <b>0.0</b><br>(NS)                                                                                                                        |
| <b>Chai et al., 2012 [41]</b>             | Healthy | Dried plum or dried apple<br><br>T1: Group DP (55)<br>T2: Group DA (45)    | Mix (poly)phenols                                                                                                 | NI                          | 90<br>180<br>365 | <b>T1: Group DP</b><br>B: 67.0 ± 16.0<br>A90: 68.0 ± 15.0<br>A180: 68.0 ± 15.0<br>A365: 67.0 ± 15.0 | <b>+1.0</b><br><b>+1.0</b><br><b>0.0</b><br>(NS) | <b>T2: Group DA</b><br>B: 62.0 ± 15.0<br>A90: 64.0 ± 15.0<br>A180: 62.0 ± 15.0<br>A365: 64.0 ± 19.0                                | <b>+2.0</b><br><b>0.0</b><br><b>+2.0</b><br>(NS) | <b>Group DA vs DP</b><br><b>+1.0</b><br><b>-1.0</b><br><b>+2.0</b><br>(NS)                                                                |
| <b>Al-Dashti et al., 2019 [34]</b>        | Healthy | Prunes<br><br>T1: Low dose 14 g (27)<br>T2: High dose 42 g (27)            | Mix (poly)phenols (chlorogenic, neochlorogenic acids, others)                                                     | NI                          | 14               | <b>T1: Low dose</b><br>B: 63.0 <sup>δ</sup> ± 23.0<br>A: 63.0 <sup>δ</sup> ± 23.0                   | <b>0.0</b><br>(NS)                               | <b>T2: High dose</b><br>B: 62.0 <sup>δ</sup> ± 23.0<br>A: 62.0 <sup>δ</sup> ± 22.0                                                 | <b>-0.90</b><br>(NS)                             | <b>High vs Low</b><br><b>-0.90</b><br>(NS)                                                                                                |
| <b>Garcia-Yu et al., 2020 [42]</b>        | Healthy | 10g of dark chocolate (99% cocoa)<br><br>Control (66)<br>Treated (71)      | Flavanols                                                                                                         | 65                          | 180              | B: 65.8 ± 13.2<br>A: 65.0 ± 12.9                                                                    | -0.90<br>(NS)                                    | B: 68.2 ± 17.3<br>A: 67.0 ± 15.9                                                                                                   | -1.2<br>(NS)                                     | -0.32<br>(NS)                                                                                                                             |
| <b>Estévez-Santiago et al., 2019 [44]</b> | Healthy | Capsules<br><br>T1: Group X (26)<br>T2: Group A (23)<br>T3: Group A+X (23) | T1: Xanthophylls (lutein+zeaxanthin)<br>T2: Anthocyanins<br>T3: Anthocyanins and xanthophylls (lutein+zeaxanthin) | T1: 8.0<br>T2: 60<br>T3: 68 | 120<br>240       | <b>T1: Group X</b><br>B: 66.4 ± 12.7<br>A120: NI<br>A240: NI                                        | NI<br>NI<br>(NS)                                 | <b>T2: Group A</b><br>B: 63.3 ± 12.7<br>A120: NI<br>A240: NI<br><br><b>T3: Group A+X</b><br>B: 71.4 ± 13.5<br>A120: NI<br>A240: NI | NI<br>NI<br>(NS)<br><br>NI<br>NI<br>(NS)         | <b>Group A vs X</b><br>NI<br>NI<br>(NS)<br><br><b>Group A+X vs X</b><br>NI<br>NI<br>(NS)<br><br><b>Group A+X vs A</b><br>NI<br>NI<br>(NS) |

|                                  |                                     |                                                                                                                               |                                            |                        |            |                                                       |                                |                                                        |                                |                                        |
|----------------------------------|-------------------------------------|-------------------------------------------------------------------------------------------------------------------------------|--------------------------------------------|------------------------|------------|-------------------------------------------------------|--------------------------------|--------------------------------------------------------|--------------------------------|----------------------------------------|
| Trius-Soler et al., 2021 [44]    | Healthy                             | Beer beverage with and without alcohol<br>Control (14)<br>T1: Group AB (16)<br>T2: Group NAB (7)                              | Prenylflavonoids                           | T1: 0.359<br>T2: 0.259 | 180        | B: 56.0 ± 13.0<br>A: NI                               | NI<br>(NS)                     | T1: Group AB<br>B: 57.0 ± 8.0<br>A: NI                 | NI<br>(NS)                     | Group AB <i>vs</i> C<br>+3.5<br>(NS)   |
|                                  |                                     |                                                                                                                               |                                            |                        |            |                                                       |                                | T2: Group NAB<br>B: 56.0 ± 13.0<br>A: NI               |                                | Group NAB <i>vs</i> C<br>+1.3<br>(NS)  |
|                                  |                                     |                                                                                                                               |                                            |                        |            |                                                       |                                |                                                        |                                | Groups <i>vs</i> C<br>NI<br>(NS)       |
|                                  |                                     |                                                                                                                               |                                            |                        |            |                                                       |                                |                                                        |                                | Group NAB <i>vs</i> AB<br>-2.2<br>(NS) |
| Wang-Polagruto et al., 2006 [25] | Dyslipidaemia (high cholesterol)    | Flavanol cocoa beverage<br><br>T1: Low flavanol (16)<br>T2: High flavanol (16)                                                | Mix flavanols                              | T1: 43<br>T2: 446      | 42         | B: 68.1 ± 45.0<br>A: 61.7 ± NI                        | -6.5<br>( $<0.050$ )           | B: 69.7 ± 19.0<br>A: 74.3 ± NI                         | +4.6<br>( $<0.050$ )           | +11.1<br>( $<0.050$ )                  |
|                                  |                                     |                                                                                                                               |                                            |                        |            |                                                       |                                |                                                        |                                |                                        |
| Filip et al., 2015 [28]          | Osteopenia (mix cholesterol levels) | Olive leaf extract<br>Placebo (400 mg Ca capsules) (21)<br>Treated (400 mg Ca + 250 mg olive extract capsules) (27)           | Mix (poly)phenols (>40% oleuropein)        | >100 oleuropein        | 180<br>365 | B: 50.1 ± 9.7<br>A180: 51.1 ± 6.0<br>A365: 51.4 ± 9.3 | +1.0<br>+1.3<br>(365d)<br>(NS) | B: 48.2 ± 10.2<br>A180: 51.6 ± 8.1<br>A365: 53.9 ± 8.9 | +3.4<br>+5.6<br>(365d)<br>(NS) | +2.3<br>+4.3<br>(NS)                   |
|                                  |                                     |                                                                                                                               |                                            |                        |            |                                                       |                                |                                                        |                                |                                        |
|                                  |                                     |                                                                                                                               |                                            |                        |            |                                                       |                                |                                                        |                                |                                        |
| D'Anna et al., 2014 [31]         | Diagnosis of metabolic syndrome     | Capsules (30 mg of cocoa (poly)phenols, 80 mg of soy isoflavones, and 2g of myo-inositol)<br><br>Placebo (21)<br>Treated (22) | Cocoa (poly)phenols and of soy isoflavones | 110                    | 180        | B: 45.0 ± 6.0<br>A: 46.0 ± 8.0                        | +1.0<br>(NS)                   | B: 44.0 ± 7.0<br>A: 50.0 ± 6.0                         | +6.0<br>(NS)                   | +5.0<br>(NS)                           |
|                                  |                                     |                                                                                                                               |                                            |                        |            |                                                       |                                |                                                        |                                |                                        |
| Naissides et al., 2006b [27]     | Dyslipidaemia (high cholesterol)    | Red wine RW (2.5 g (poly)phenols/L)<br><br>Control (400 mL water) (16)<br><br>T1: Group DRW non-alcohol (400 mL) (15)         | Mix (poly)phenols                          | 1000                   | 42         | B: NI<br>A: NI                                        | +7.1‡<br>(NI)                  | T1: Group DRW<br>B: NI<br>A: NI                        | DRW<br>-4.7‡<br>(NS)           | Group DRW <i>vs</i> C<br>NI<br>(NS)    |
|                                  |                                     |                                                                                                                               |                                            |                        |            |                                                       |                                | T2: Group RW<br>B: NI<br>A: NI                         |                                | Group RW <i>vs</i> C<br>NI<br>(NS)     |
|                                  |                                     |                                                                                                                               |                                            |                        |            |                                                       |                                |                                                        |                                |                                        |

T2: Group RW alcohol (400 mL)  
(14)

Groups *vs* C  
NI  
(NI)

Group DRW *vs* RW  
NI  
(NS)

|                                            |       |                             |                       |    |     |                |             |                |             |             |
|--------------------------------------------|-------|-----------------------------|-----------------------|----|-----|----------------|-------------|----------------|-------------|-------------|
| Aubertin-<br>Leheudre et<br>al., 2008 [45] | Obese | Soybeans capsules (17.5 mg) | Mix isoflavones       | 70 | 180 | B: 55.9 ± 14.3 | <b>+3.9</b> | B: 59.8 ± 18.9 | <b>-5.4</b> | <b>-9.3</b> |
|                                            |       | Placebo (18)                | (daidzein, glycitein, |    |     | A: 59.8 ± 13.1 | (NS)        | A: 54.4 ± 11.2 | (NS)        | (NS)        |
|                                            |       | Treated (21)                | and genistein)        |    |     |                |             |                |             |             |

Data are presented as the mean ± SD unless otherwise stated; B: Before intervention; A: After intervention; NS: Not significant; NI: Not indicated; C: Control; T: Treated; P: Placebo; EGCG: Epigallocatechin gallate; EC: Epicatechin; EGC: Epigallocatechin; ECG: Epicatechin gallate; GCG: Gallocatechin gallate; DP: Dried plum; DA: Dried apple; AB: Alcoholic beer; NAB: Dealcoholized beer; DRW: Dealcoholized red wine; RW: Red wine; Ca: Calcium; ‡: % change reported by the authors; <sup>δ</sup>: geometric mean [95% CI]; **numbers in bold** are the changes estimated as the mean difference: (A) after – (B) before (intra-group) or treated – control or placebo or comparator (between groups).

**Table S7.** Changes in total triglycerides as reported in human RCTs (parallel or crossover design) looking at the chronic effects of (poly)phenol-containing products in postmenopausal women, without hormone replacement therapy or lipid-lowering therapy.

| References                    | Health status                   | Treatment Groups<br>(N participants per group)                                                 | (Poly)phenols                                                                                | Dose<br>(poly)phenols<br>(mg/d) | Duration<br>(d) | Total circulating triglycerides (mg/dL)                                    |                               |                                                                            |                               |                                                        |
|-------------------------------|---------------------------------|------------------------------------------------------------------------------------------------|----------------------------------------------------------------------------------------------|---------------------------------|-----------------|----------------------------------------------------------------------------|-------------------------------|----------------------------------------------------------------------------|-------------------------------|--------------------------------------------------------|
|                               |                                 |                                                                                                |                                                                                              |                                 |                 | Control/Placebo/<br>Comparator                                             | $\Delta$ (A – B)<br>(p-value) | Treatment                                                                  | $\Delta$ (A – B)<br>(p-value) | $\Delta$ (Treatment –<br>Control/Placebo)<br>(p-value) |
| Cheng et al., 2004 [36]       | Healthy                         | Capsules                                                                                       | Isoflavones (daidzein and genistein) in evening primrose oil                                 | 100                             | 90<br>180       | B: 122.2 ± 52.3                                                            | <b>+24.8</b>                  | B: 111.6 ± 43.4                                                            | <b>+15.9</b>                  | <b>-8.9</b>                                            |
|                               |                                 | Estrogen (11)                                                                                  |                                                                                              |                                 |                 | A90: 147.1 ± 74.4                                                          | <b>+16.9</b>                  | A90: 127.6 ± 73.5                                                          | <b>+1.8</b>                   | <b>-15.1</b>                                           |
|                               |                                 | Isoflavone (17)                                                                                |                                                                                              |                                 |                 | A180: 139.1 ± 107.2                                                        | (NS)                          | A180: 113.4 ± 48.7                                                         | (NS)                          | (NS)                                                   |
| Sathyapalan et al., 2018 [37] | Healthy                         | Snack bars (soy protein free isoflavones or with isoflavones)                                  | Mix isoflavones                                                                              | 66                              | 180             | B: 104.5 ± 50.5                                                            | <b>+7.9</b>                   | B: 102.8 ± 47.8                                                            | <b>+5.3</b>                   | <b>-2.7</b>                                            |
|                               |                                 | Placebo (60)<br>Treated (60)                                                                   |                                                                                              |                                 |                 | A: 112.5 ± 80.6                                                            | (NS)                          | A: 108.1 ± 62.9                                                            | (NS)                          | (NS)                                                   |
| Myasoedova et al., 2016 [35]  | Healthy                         | Mixed herbs capsules (500 mg of mix grape seeds, green tea leaves, hop cone and garlic powder) | Mix (poly)phenols (procyanidin, genistein, daidzein, flavones, resveratrol, other phenolics) | 283                             | 365             | B: 126.0 ± 51.0                                                            | -9.0                          | B: 134.0 ± 78.0                                                            | -9.0                          | NI                                                     |
|                               |                                 | Placebo (71)<br>Treated ×3 capsules/d (56)                                                     |                                                                                              |                                 |                 | A: NI                                                                      | (NS)                          | A: NI                                                                      | (NS)                          | (NS)                                                   |
| D'Anna et al., 2014 [31]      | Diagnosis of metabolic syndrome | Capsules (30 mg of cocoa (poly)phenols, 80 mg of soy isoflavones, and 2g of myo-inositol)      | Cocoa (poly)phenols and of soy isoflavones                                                   | 110                             | 180             | B: 180.0 ± 20.0                                                            | <b>-15.0</b>                  | B: 177.0 ± 19.0                                                            | <b>-32.0</b>                  | <b>-17.0</b>                                           |
|                               |                                 | Placebo (21)<br>Treated (22)                                                                   |                                                                                              |                                 |                 | A: 165.0 ± 18.0                                                            | (0.008)                       | A: 145.0 ± 14.0                                                            | (<0.001)                      | (<0.001)                                               |
| Wu et al., 2012 [38]          | Healthy                         | Green tea extract capsules                                                                     | Mix (poly)phenols (mostly EGCG plus EC, EGC, ECG, and GCG)                                   | T1: 400<br>T2: 800              | 60              | B: 106.0 [91.0, 124.0] <sup>§</sup><br>A: 109.0 [94.0, 127.0] <sup>§</sup> | <b>+3.0</b><br>(NS)           | <b>T1: Group G400</b>                                                      | <b>G400</b>                   | <b>Group G400 vs P</b>                                 |
|                               |                                 | Placebo (32)                                                                                   |                                                                                              |                                 |                 |                                                                            |                               | B: 107.0 [93.0, 123.0] <sup>§</sup><br>A: 106.0 [93.0, 121.0] <sup>§</sup> | <b>-1.0</b><br>(NS)           | <b>-4.0</b><br>(NS)                                    |
|                               |                                 | T1: Group G400 (37)<br>T2: Group G800 (34)                                                     |                                                                                              |                                 |                 |                                                                            |                               | <b>T2: Group G800</b><br>B: 108.0 [93.0, 125.0] <sup>§</sup>               | <b>G800</b><br><b>+10.0</b>   | <b>Group G800 vs P</b><br><b>+7.0</b>                  |

|                                    |         |                                                                          |                                                                                          |      |                  |                                                                                                         |                                                       |                                                                                                         |                                                       |                                                                                     |                                  |
|------------------------------------|---------|--------------------------------------------------------------------------|------------------------------------------------------------------------------------------|------|------------------|---------------------------------------------------------------------------------------------------------|-------------------------------------------------------|---------------------------------------------------------------------------------------------------------|-------------------------------------------------------|-------------------------------------------------------------------------------------|----------------------------------|
|                                    |         |                                                                          |                                                                                          |      |                  |                                                                                                         |                                                       | A: 118.0 [103.0, 136.0] <sup>δ</sup>                                                                    | (0.042)                                               | (NS)                                                                                | <b>Groups <i>vs</i> P</b>        |
|                                    |         |                                                                          |                                                                                          |      |                  |                                                                                                         |                                                       |                                                                                                         |                                                       |                                                                                     | NI<br>(NS)                       |
|                                    |         |                                                                          |                                                                                          |      |                  |                                                                                                         |                                                       |                                                                                                         |                                                       |                                                                                     | <b>Group G800 <i>vs</i> G400</b> |
|                                    |         |                                                                          |                                                                                          |      |                  |                                                                                                         |                                                       |                                                                                                         |                                                       |                                                                                     | <b>+13</b>                       |
|                                    |         |                                                                          |                                                                                          |      |                  |                                                                                                         |                                                       |                                                                                                         |                                                       |                                                                                     | NI<br>(0.090)                    |
| <b>Curtis et al., 2009 [39]</b>    | Healthy | Elderberry extract capsules (125 mg)<br><br>Placebo (26)<br>Treated (26) | Mix anthocyanins (mostly cyanidin-3-glucoside) per capsule                               | 500  | 84               | B: 79.7 ± 26.6<br>A: 88.6 ± 35.4                                                                        | <b>+8.9</b><br>(NS)                                   | B: 79.7 ± 26.6<br>A: 88.6 ± 26.6                                                                        | <b>+8.9</b><br>(NS)                                   | <b>0.0</b><br>(NS)                                                                  |                                  |
| <b>Zern et al., 2005 [40]</b>      | Healthy | Lyophilized grape powder<br><br>Placebo (20)<br>Treated (20)             | Mix grape (poly)phenols (anthocyanins, quercetin, myricetin, kaempferol and resveratrol) | ~210 | 28               | B: 132.9 ± 106.3<br>A: 150.6 ± 88.6                                                                     | <b>+17.7</b><br>(NS)                                  | B: 132.9 ± 106.3<br>A: 141.8 ± 97.45                                                                    | <b>+8.9</b><br>(NS)                                   | <b>-8.9</b><br>(0.002)                                                              |                                  |
| <b>Chai et al., 2012 [41]</b>      | Healthy | Dried plum or dried apple<br><br>T1: Group DP (55)<br>T2: Group DA (45)  | Mix (poly)phenols                                                                        | NI   | 90<br>180<br>365 | <b>T1: Group DP</b><br>B: 103.0 ± 13.0<br>A90: 106.0 ± 33.0<br>A180: 111.0 ± 38.0<br>A365: 111.0 ± 34.0 | <br><b>+3.0</b><br><b>+8.0</b><br><b>+8.0</b><br>(NS) | <b>T2: Group DA</b><br>B: 115.0 ± 38.9<br>A90: 110.0 ± 34.8<br>A180: 118.0 ± 45.5<br>A365: 104.0 ± 33.5 | <br><b>-5.0</b><br><b>-9.0</b><br><b>-9.0</b><br>(NS) | <b>Group DA <i>vs</i> DP</b><br><b>-8.0</b><br><b>-17.0</b><br><b>-17.0</b><br>(NS) |                                  |
| <b>Al-Dashti et al., 2019 [34]</b> | Healthy | Prunes<br><br>T1: Low dose 14 g (27)<br>T2: High dose 42 g (27)          | Mix (poly)phenols (chlorogenic, neochlorogenic acids, others)                            | NI   | 14               | <b>T1: Low dose</b><br>B: 99.0 <sup>δ</sup> ± 107.0<br>A: 93.0 <sup>δ</sup> ± 96.0                      | <br>-6.0<br>(NS)                                      | <b>T2: High dose</b><br>B: 91.0 <sup>δ</sup> ± 71.0<br>A: 95.0 <sup>δ</sup> ± 91.0                      | <br>+5.0<br>(NS)                                      | <b>High <i>vs</i> Low</b><br>+10.0<br>(NS)                                          |                                  |
| <b>García-Yu et al., 2020 [42]</b> | Healthy | 10g of dark chocolate (99% cocoa)<br><br>Control (66)<br>Treated (71)    | Flavanols                                                                                | 65   | 180              | B: 80.0 ± 34.3<br>A: 80.3 ± 28.5                                                                        | +0.20<br>(NS)                                         | B: 83.4 ± 30.6<br>A: 83.1 ± 34.7                                                                        | -0.30<br>(NS)                                         | -0.49<br>(NS)                                                                       |                                  |

|                                    |                                  |                                                            |                                                         |                             |            |                                                              |                  |                                                                |                     |                                           |
|------------------------------------|----------------------------------|------------------------------------------------------------|---------------------------------------------------------|-----------------------------|------------|--------------------------------------------------------------|------------------|----------------------------------------------------------------|---------------------|-------------------------------------------|
| Estévez-Santiago et al., 2019 [44] | Healthy                          | Capsules                                                   | T1: Xanthophylls (lutein+zeaxanthin)                    | T1: 8.0<br>T2: 60<br>T3: 68 | 120<br>240 | T1: <b>Group X</b><br>B: 84.2 ± 33.7<br>A120: NI<br>A240: NI | NI<br>NI<br>(NS) | T2: <b>Group A</b><br>B: 92.1 ± 32.8<br>A120: NI<br>A240: NI   | NI<br>NI<br>(NS)    | <b>Group A vs X</b><br>NI<br>NI<br>(NS)   |
|                                    |                                  | T1: Group X (26)<br>T2: Group A (23)<br>T3: Group A+X (23) | T2: Anthocyanins                                        |                             |            |                                                              |                  | T3: <b>Group A+X</b><br>B: 81.5 ± 26.6<br>A120: NI<br>A240: NI | NI<br>NI<br>(NS)    | <b>Group A+X vs X</b><br>NI<br>NI<br>(NS) |
|                                    |                                  |                                                            | T3: Anthocyanins and xanthophylls (lutein + zeaxanthin) |                             |            |                                                              |                  |                                                                |                     | <b>Group A+X vs A</b><br>NI<br>NI<br>(NS) |
|                                    |                                  |                                                            |                                                         |                             |            |                                                              |                  |                                                                |                     |                                           |
| Trius-Soler et al., 2021 [32]      | Healthy                          | Beer beverage with and without alcohol                     | Prenylflavonoids                                        | T1: 0.359<br>T2: 0.259      | 180        | B: 69.0 ± 32.0<br>A: NI                                      | NI<br>(NS)       | T1: <b>Group AB</b><br>B: 77.0 ± 25.0<br>A: NI                 | NI<br>(NS)          | <b>Group AB vs C</b><br>+7.2<br>(NS)      |
|                                    |                                  | Control (14)<br>T1: Group AB (16)<br>T2: Group NAB (7)     |                                                         |                             |            |                                                              |                  | T2: <b>Group NAB</b><br>B: 66.0 ± 18.0<br>A: NI                | NI<br>(NS)          | <b>Group NAB vs C</b><br>+5.3<br>(NS)     |
|                                    |                                  |                                                            |                                                         |                             |            |                                                              |                  |                                                                |                     | <b>Groups vs C</b><br>NI<br>(NS)          |
|                                    |                                  |                                                            |                                                         |                             |            |                                                              |                  |                                                                |                     | <b>Group NAB vs AB</b><br>-1.9<br>(NS)    |
| Wang-Polagruto et al., 2006 [25]   | Dyslipidaemia (high cholesterol) | Flavanol cocoa beverage                                    | Mix flavanols                                           | T1: 43<br>T2: 446           | 42         | T1: <b>Low flavanol</b><br>B: 111.1 ± 85.0<br>A: NI          | NI<br>(NS)       | T2: <b>High flavanol</b><br>B: 79.7 ± 31.0<br>A: NI            | NI<br>(NS)          | <b>High vs Low</b><br>NI<br>(NS)          |
|                                    |                                  | T1: Low flavanol (16)<br>T2: High flavanol (16)            |                                                         |                             |            |                                                              |                  |                                                                |                     |                                           |
| Naissides et al., 2006b [27]       | Dyslipidaemia (high cholesterol) | Red wine RW (2.5 g (poly)phenols/L)                        | Mix (poly)phenols                                       | 1000                        | 42         | B: 109.9 ± 43.0<br>A: 107.2 ± 35.0                           | -2.7<br>(NS)     | T1: <b>Group DRW</b><br>B: 117.8 ± 59.0<br>A: 116.1 ± 48.0     | DRW<br>-1.8<br>(NS) | <b>Group DRW vs C</b><br>-0.89<br>(NS)    |
|                                    |                                  | Control (400 mL water) (16)                                |                                                         |                             |            |                                                              |                  | T2: <b>Group RW</b>                                            | RW                  | <b>Group RW vs C</b>                      |



|                                            |                                     |                                                                               |                                                      |                    |            |                                                             |                                           |                                                           |                                          |                                                 |
|--------------------------------------------|-------------------------------------|-------------------------------------------------------------------------------|------------------------------------------------------|--------------------|------------|-------------------------------------------------------------|-------------------------------------------|-----------------------------------------------------------|------------------------------------------|-------------------------------------------------|
|                                            |                                     | T1: Group DRW non-alcohol (400 mL) (15)<br>T2: Group RW alcohol (400 mL) (14) |                                                      |                    |            | B: 105.4 ± 50.0<br>A: 114.3 ± 59.0                          |                                           | <b>+8.9</b><br>(NS)                                       |                                          | <b>+11.5</b><br>(NS)                            |
|                                            |                                     |                                                                               |                                                      |                    |            |                                                             |                                           |                                                           |                                          | <b>Groups vs C</b><br>NI<br>(NS)                |
|                                            |                                     |                                                                               |                                                      |                    |            |                                                             |                                           |                                                           |                                          | <b>Group DRW vs RW</b><br>- <b>10.6</b><br>(NS) |
| <b>Aubertin-Leheudre et al., 2008 [45]</b> | Obese                               | Soybeans capsules (17.5 mg)                                                   | Mix isoflavones (daidzein, glycitein, and genistein) | 70                 | 180        | B: 134.7 ± 61.0<br>A: 118.7 ± 52.0                          | <b>-15.9</b><br>(NS)                      | B: 133.8 ± 61.0<br>A: 125.8 ± 52.0                        | <b>-7.9</b><br>(NS)                      | <b>+7.9</b><br>(NS)                             |
|                                            |                                     | Placebo (18)<br>Treated (21)                                                  |                                                      |                    |            |                                                             |                                           |                                                           |                                          |                                                 |
| <b>Filip et al., 2015 [28]</b>             | Osteopenia (mix cholesterol levels) | Olive leaf extract                                                            | Mix (poly)phenols (>40% oleuropein)                  | >100<br>oleuropein | 180<br>365 | B: 122.2 ± 59.6<br>A180: 130.9 ± 60.1<br>A365: 141.6 ± 77.4 | <b>+8.7</b><br>+18.9<br>(365d)<br>(0.010) | B: 98.8 ± 42.9<br>A180: 104.6 ± 59.9<br>A365: 94.7 ± 37.5 | <b>+5.8</b><br>-4.2<br>(365d)<br>(0.010) | <b>-2.9</b><br>-23.0<br>(NS)                    |
|                                            |                                     | Placebo (400 mg Ca capsules) (21)                                             |                                                      |                    |            |                                                             |                                           |                                                           |                                          |                                                 |
|                                            |                                     | Treated (400 mg Ca + 250 mg olive extract capsules) (27)                      |                                                      |                    |            |                                                             |                                           |                                                           |                                          |                                                 |

Data are presented as the mean ± SD unless otherwise stated; B: Before intervention; A: After intervention; NS: Not significant; NI: Not indicated; C: Control; T: Treated; P: Placebo; EGCG: Epigallocatechin gallate; EC: Epicatechin; EGC: Epigallocatechin; ECG: Epicatechin gallate; GCG: Gallocatechin gallate; DP: Dried plum; DA: Dried apple; AB: Alcoholic beer; NAB: Dealcoholized beer; DRW: Dealcoholized red wine; RW: Red wine; Ca: Calcium; <sup>§</sup>: geometric mean [95% CI]; **numbers in bold** are the changes estimated as the mean difference: (A) after – (B) before (intra-group) or treated – control or placebo or comparator (between groups).

**Table S8.** Changes in systolic and diastolic blood pressure as reported in human RCTs (parallel or crossover design) looking at the chronic effects of (poly)phenol-containing products in postmenopausal women, without hormone replacement therapy.

| References                       | Health status | Treatment Groups<br>(N participants per group)                                                          | (Poly)phenols                                                                                               | Dose<br>(poly)phenols<br>(mg /d) | Duration<br>(d) | Blood pressure (mmHg)          |                                        |                              |                                        |                                                                 |
|----------------------------------|---------------|---------------------------------------------------------------------------------------------------------|-------------------------------------------------------------------------------------------------------------|----------------------------------|-----------------|--------------------------------|----------------------------------------|------------------------------|----------------------------------------|-----------------------------------------------------------------|
|                                  |               |                                                                                                         |                                                                                                             |                                  |                 | Control/Placebo/<br>Comparator | $\Delta$ (A – B)<br>( <i>p</i> -value) | Treatment                    | $\Delta$ (A – B)<br>( <i>p</i> -value) | $\Delta$ (Treatment –<br>Control/Placebo)<br>( <i>p</i> -value) |
| Sathyapalan<br>et al., 2018 [37] | Healthy       | Snack bars (soy protein free<br>isoflavones or with<br>isoflavones)                                     | Mix isoflavones                                                                                             | 66                               | 180             | <i>Systolic</i>                |                                        |                              |                                        |                                                                 |
|                                  |               |                                                                                                         |                                                                                                             |                                  |                 | B: 124.6 ± 18.8                | -0.80                                  | B: 125.0 ± 20.2              | -3.2                                   | -2.5                                                            |
|                                  |               |                                                                                                         |                                                                                                             |                                  |                 | A: 123.4 ± 16.0                | (NI)                                   | A: 121.2 ± 14.9              | (NI)                                   | (<0.01)                                                         |
|                                  |               |                                                                                                         |                                                                                                             |                                  |                 | <i>Diastolic</i>               |                                        |                              |                                        |                                                                 |
| Myasoedova<br>et al., 2016 [35]  | Healthy       | Mixed herbs capsules (500<br>mg of mix grape seeds,<br>green tea leaves, hop cone<br>and garlic powder) | Mix (poly)phenols<br>(procyanidin,<br>genistein, daidzein,<br>flavones,<br>resveratrol, other<br>phenolics) | 283                              | 365             | <i>Systolic</i>                |                                        |                              |                                        |                                                                 |
|                                  |               |                                                                                                         |                                                                                                             |                                  |                 | B: 135.0 ± 18.0                | -1.0                                   | B: 127.0 ± 13.0              | +5.0                                   | <b>+4.0</b>                                                     |
|                                  |               |                                                                                                         |                                                                                                             |                                  |                 | A: NI                          | (NS)                                   | A: NI                        | (0.051)                                | (NS)                                                            |
|                                  |               |                                                                                                         |                                                                                                             |                                  |                 | <i>Diastolic</i>               |                                        |                              |                                        |                                                                 |
| Curtis et al.,<br>2009 [39]      | Healthy       | Elderberry extract capsules<br>(125 mg)                                                                 | Mix anthocyanins<br>(mostly cyanidin-3-<br>glucoside) per<br>capsule                                        | 500                              | 84              | <i>Systolic</i>                |                                        |                              |                                        |                                                                 |
|                                  |               |                                                                                                         |                                                                                                             |                                  |                 | B: 130.0 ± 14.0                | <b>-6.0</b>                            | B: 123.0 ± 15.0              | <b>+1.0</b>                            | <b>+7.0</b>                                                     |
|                                  |               |                                                                                                         |                                                                                                             |                                  |                 | A: 124.0 ± 15.0                | (NI)                                   | A: 124.0 ± 13.0              | (NI)                                   | (NI)                                                            |
|                                  |               |                                                                                                         |                                                                                                             |                                  |                 | <i>Diastolic</i>               |                                        |                              |                                        |                                                                 |
| Al-Dashti et<br>al., 2019 [34]   | Healthy       | Prunes<br><br>T1: Low dose 14 g (27)<br>T2: High dose 42 g (27)                                         | Mix (poly)phenols<br>(chlorogenic,<br>neochlorogenic<br>acids, others)                                      | NI                               | 14              | <i>Systolic</i>                |                                        |                              |                                        |                                                                 |
|                                  |               |                                                                                                         |                                                                                                             |                                  |                 | <b>T1: Low dose</b>            |                                        | <b>T2: High dose</b>         |                                        | <b>High vs Low</b>                                              |
|                                  |               |                                                                                                         |                                                                                                             |                                  |                 | B: 115.0 <sup>δ</sup> ± 21.0   | -1.0                                   | B: 115.0 <sup>δ</sup> ± 18.0 | <b>-0.80</b>                           | <b>+0.20</b>                                                    |
|                                  |               |                                                                                                         |                                                                                                             |                                  |                 | A: 114.0 <sup>δ</sup> ± 18.0   | (NS)                                   | A: 114.0 <sup>δ</sup> ± 18.0 | (NS)                                   | (NS)                                                            |
| Garcia-Yu et<br>al., 2020 [42]   | Healthy       | 10 g of dark chocolate (99%<br>cocoa)<br><br>Control (66)                                               | Flavanols                                                                                                   | 65                               | 180             | <i>Diastolic</i>               |                                        |                              |                                        |                                                                 |
|                                  |               |                                                                                                         |                                                                                                             |                                  |                 | <b>T1: Low dose</b>            |                                        | <b>T2: High dose</b>         |                                        | <b>High vs Low</b>                                              |
|                                  |               |                                                                                                         |                                                                                                             |                                  |                 | B: 75.0 <sup>δ</sup> ± 11.0    | <b>0.0</b>                             | B: 76.0 <sup>δ</sup> ± 10.0  | <b>-2.0</b>                            | <b>-2.0</b>                                                     |
|                                  |               |                                                                                                         |                                                                                                             |                                  |                 | A: 75.0 <sup>δ</sup> ± 11.0    | (NS)                                   | A: 74.0 <sup>δ</sup> ± 10.0  | (NS)                                   | (NS)                                                            |
|                                  |               |                                                                                                         |                                                                                                             |                                  |                 | <i>Systolic</i>                |                                        |                              |                                        |                                                                 |
|                                  |               |                                                                                                         |                                                                                                             |                                  |                 | B: 108.0 ± 15.0                | -0.20                                  | B: 108.0 ± 16.4              | -1.8                                   | -1.45                                                           |
|                                  |               |                                                                                                         |                                                                                                             |                                  |                 | A: 108.0 ± 14.4                | (NS)                                   | A: 106.0 ± 14.1              | (NS)                                   | (NS)                                                            |
|                                  |               |                                                                                                         |                                                                                                             |                                  |                 |                                |                                        |                              |                                        |                                                                 |

| Treated (71)                       |         |                               |                                        |           |     |                      |              |                    |              |                       |
|------------------------------------|---------|-------------------------------|----------------------------------------|-----------|-----|----------------------|--------------|--------------------|--------------|-----------------------|
|                                    |         |                               |                                        |           |     | <i>Diastolic</i>     |              |                    |              |                       |
|                                    |         |                               |                                        |           |     | B: 72.2 ± 10.3       | -0.70        | B: 72.6 ± 10.7     | -0.30        | +0.59                 |
|                                    |         |                               |                                        |           |     | A: 71.4 ± 10.1       | (NS)         | A: 72.4 ± 10.0     | (NS)         | (NS)                  |
| Estévez-Santiago et al., 2019 [44] | Healthy | Capsules                      | T1: Xanthophylls (lutein + zeaxanthin) | T1: 8.0   | 120 | <i>Systolic</i>      |              |                    |              |                       |
|                                    |         |                               |                                        |           |     | <b>T1: Group X</b>   |              | <b>T2: Group A</b> |              | <b>Group A vs X</b>   |
|                                    |         |                               |                                        |           |     | B: 115.0 ± 14.0      | <b>0.0</b>   | B: 118.0 ± 17.0    | <b>0.0</b>   | <b>0.0</b>            |
|                                    |         |                               |                                        |           |     | A120: 115.0 ± 17.0   | <b>-2.00</b> | A120: 118.0 ± 17.0 | <b>+2.00</b> | <b>+4.00</b>          |
|                                    |         |                               |                                        |           |     | A240: 113.0 ± 13.0   | (NS)         | A240: 120.0 ± 16.0 | (NS)         | (NS)                  |
|                                    |         |                               |                                        |           |     | <b>T3: Group A+X</b> |              |                    |              | <b>Group A+X vs X</b> |
|                                    |         |                               |                                        |           |     | B: 121.0 ± 12.0      |              | B: 121.0 ± 12.0    | <b>-3.0</b>  | <b>-3.0</b>           |
|                                    |         |                               |                                        |           |     | A120: 118.0 ± 15.0   |              | A120: 118.0 ± 15.0 | <b>-1.0</b>  | <b>+1.0</b>           |
|                                    |         |                               |                                        |           |     | A240: 120.0 ± 12.0   |              | A240: 120.0 ± 12.0 | (NS)         | (NS)                  |
|                                    |         |                               |                                        |           |     |                      |              |                    |              | <b>Group A+X vs A</b> |
|                                    |         |                               |                                        |           |     |                      |              |                    |              | -3.0                  |
|                                    |         |                               |                                        |           |     |                      |              |                    |              | -3.0                  |
|                                    |         |                               |                                        |           |     |                      |              |                    |              | (NS)                  |
|                                    |         |                               |                                        |           |     | <i>Diastolic</i>     |              |                    |              |                       |
|                                    |         |                               |                                        |           |     | <b>T1: Group X</b>   |              | <b>T2: Group A</b> |              | <b>Group A vs X</b>   |
|                                    |         |                               |                                        |           |     | B: 74.0 ± 10.0       | <b>0.0</b>   | B: 76.0 ± 11.0     | <b>-1.0</b>  | <b>-1.0</b>           |
|                                    |         |                               |                                        |           |     | A120: 74.0 ± 10.0    | <b>0.0</b>   | A120: 75.0 ± 9.0   | <b>0.0</b>   | <b>0.0</b>            |
|                                    |         |                               |                                        |           |     | A240: 74.0 ± 9.0     | (NS)         | A240: 76.0 ± 11.0  | (NS)         | (NS)                  |
|                                    |         |                               |                                        |           |     | <b>T2: Group A+X</b> |              |                    |              | <b>Group A+X vs C</b> |
|                                    |         |                               |                                        |           |     | B: 79.0 ± 9.0        |              | B: 79.0 ± 9.0      | <b>-1.0</b>  | <b>0.00</b>           |
|                                    |         |                               |                                        |           |     | A120: 78.0 ± 9.0     |              | A120: 78.0 ± 9.0   | <b>-3.0</b>  | <b>-3.0</b>           |
|                                    |         |                               |                                        |           |     | A240: 76.0 ± 10      |              | A240: 76.0 ± 10    | (NS)         | (NS)                  |
|                                    |         |                               |                                        |           |     |                      |              |                    |              | <b>Group A+X vs X</b> |
|                                    |         |                               |                                        |           |     |                      |              |                    |              | +4.0                  |
|                                    |         |                               |                                        |           |     |                      |              |                    |              | +2.0                  |
|                                    |         |                               |                                        |           |     |                      |              |                    |              | (NS)                  |
| Trius-Soler et al., 2021 [32]      | Healthy | Beer beverage without alcohol | with and Prenylflavonoids              | T1: 0.359 | 180 | <i>Systolic</i>      |              |                    |              |                       |
|                                    |         |                               |                                        | T2: 0.259 |     | <b>T1: Group AB</b>  |              |                    |              | <b>Group AB vs C</b>  |

|                                         |                                        |                                                                                                     |                   |                   |    |                                                        |                                                               |                   |                                                                |                  |                                        |
|-----------------------------------------|----------------------------------------|-----------------------------------------------------------------------------------------------------|-------------------|-------------------|----|--------------------------------------------------------|---------------------------------------------------------------|-------------------|----------------------------------------------------------------|------------------|----------------------------------------|
|                                         |                                        |                                                                                                     |                   |                   |    | Control (14)<br>T1: Group AB (16)<br>T2: Group NAB (7) | B: 121.0 ± 15.0<br>A: NI                                      | NI<br>(NS)        | B: 120.0 ± 14.0<br>A: NI                                       | NI<br>(NS)       | -2.0<br>(NS)                           |
|                                         |                                        |                                                                                                     |                   |                   |    |                                                        |                                                               |                   | <b>T2: Group NAB</b><br>B: 120.0 ± 16.0<br>A: NI               | NI<br>(NS)       | <b>Group NAB vs C</b><br>-11.0<br>(NS) |
|                                         |                                        |                                                                                                     |                   |                   |    |                                                        |                                                               |                   |                                                                |                  | <b>Group NAB vs AB</b><br>-9.0<br>(NS) |
|                                         |                                        |                                                                                                     |                   |                   |    |                                                        | <i>Diastolic</i>                                              |                   |                                                                |                  |                                        |
|                                         |                                        |                                                                                                     |                   |                   |    |                                                        |                                                               |                   | <b>T1: Group AB</b><br>B: 74.0 ± 13.0<br>A: NI                 | NI<br>(NS)       | <b>Group AB vs C</b><br>+1.0<br>(NS)   |
|                                         |                                        |                                                                                                     |                   |                   |    |                                                        |                                                               |                   | <b>T2: Group NAB</b><br>B: 74.0 ± 6.0<br>A: NI                 | NI<br>(NS)       | <b>Group NAB vs C</b><br>-6.0<br>(NS)  |
|                                         |                                        |                                                                                                     |                   |                   |    |                                                        |                                                               |                   |                                                                |                  | <b>Group NAB vs AB</b><br>-7.0<br>(NS) |
|                                         |                                        |                                                                                                     |                   |                   |    |                                                        | <i>Systolic</i>                                               |                   |                                                                |                  |                                        |
|                                         |                                        |                                                                                                     |                   |                   |    |                                                        | <b>T1: Low flavanol</b><br>B: 140.0 ± 40.0<br>A: 127.0 ± 32.0 | -13.0<br>(<0.050) | <b>T2: High flavanol</b><br>B: 125.0 ± 32.0<br>A: 128.0 ± 28.0 | +3.0<br>(<0.050) | +16.0<br>(NS)                          |
|                                         |                                        |                                                                                                     |                   |                   |    |                                                        | <i>Diastolic</i>                                              |                   |                                                                |                  |                                        |
|                                         |                                        |                                                                                                     |                   |                   |    |                                                        | <b>T1: Low flavanol</b><br>B: 76.0 ± 8.0<br>A: 71.0 ± 12.0    | -5.0<br>(<0.05)   | <b>T2: High flavanol</b><br>B: 64.0 ± 12.0<br>A: 63.0 ± 12.0   | -1.0<br>(<0.05)  | +4.0<br>(NS)                           |
|                                         |                                        |                                                                                                     |                   |                   |    |                                                        | <i>Systolic</i>                                               |                   |                                                                |                  |                                        |
|                                         |                                        |                                                                                                     |                   |                   |    |                                                        | B: 110.7 ± 15.0<br>A: 113.3 ± 13.0                            | +2.6<br>(NS)      | <b>T1: Group DRW</b><br>B: 112.5 ± 18.0<br>A: 110.2 ± 12.0     | -2.3<br>(NS)     | <b>Group DRW vs C</b><br>-4.9<br>(NS)  |
|                                         |                                        |                                                                                                     |                   |                   |    |                                                        |                                                               |                   | <b>T2: Group RW</b>                                            |                  | <b>Group RW vs C</b>                   |
| Wang-<br>Polagruto et<br>al., 2006 [25] | Dyslipidaemia<br>(high<br>cholesterol) | Flavanol cocoa beverage<br><br>T1: Low flavanol (16)<br>T2: High flavanol (16)                      | Mix flavanols     | T1: 43<br>T2: 446 | 42 |                                                        |                                                               |                   |                                                                |                  |                                        |
| Naissides et<br>al., 2006a [26]         | Dyslipidaemia<br>(high<br>cholesterol) | Control (400 mL water) (16)<br><br>T1: Group DRW (400 mL)<br>(15)<br><br>T2: Group RW (400 mL) (14) | Mix (poly)phenols | 1000              | 42 |                                                        |                                                               |                   |                                                                |                  |                                        |

|                                     |                                 |                                                                                                                                |                                                                   |     |          |                                                       |                      |                                                           |                                       |
|-------------------------------------|---------------------------------|--------------------------------------------------------------------------------------------------------------------------------|-------------------------------------------------------------------|-----|----------|-------------------------------------------------------|----------------------|-----------------------------------------------------------|---------------------------------------|
|                                     |                                 |                                                                                                                                |                                                                   |     |          | B: 116.8 ± 22.0<br>A: 119.5 ± 18.0                    | +2.7<br>(NS)         | +0.10<br>(NS)                                             |                                       |
|                                     |                                 |                                                                                                                                |                                                                   |     |          | Group DRW <i>vs</i> RW<br>-5.0<br>(NI)                |                      |                                                           |                                       |
|                                     |                                 |                                                                                                                                |                                                                   |     |          | Diastolic                                             |                      |                                                           |                                       |
|                                     |                                 |                                                                                                                                |                                                                   |     |          | B: 67.9 ± 7.6<br>A: 70.0 ± 6.7                        | +2.1<br>(NS)         | T1: Group DRW<br>B: 70.5 ± 11.0<br>A: 69.6 ± 12.0         | Group DRW <i>vs</i> C<br>-3.0<br>(NS) |
|                                     |                                 |                                                                                                                                |                                                                   |     |          | T2: Group RW<br>B: 70.1 ± 8.5<br>A: 71.1 ± 12         |                      |                                                           | Group RW <i>vs</i> C<br>-1.1<br>(NS)  |
|                                     |                                 |                                                                                                                                |                                                                   |     |          | Group DRW <i>vs</i> RW<br>-1.9<br>(NI)                |                      |                                                           |                                       |
| Aubertin-Leheudre et al., 2008 [45] | Obese                           | Soybeans capsules (17.5 mg)<br>Placebo (18)<br>Treated (21)                                                                    | Mix isoflavones (daidzein, glycitein, and genistein)              | 70  | 180      | Systolic                                              |                      |                                                           |                                       |
|                                     |                                 |                                                                                                                                |                                                                   |     |          | B: 126.4 ± 10.5<br>A: 128.9 ± 11.7                    | +2.5<br>(NI)         | B: 125.1 ± 15.0<br>A: 121.9 ± 16.5                        | -3.2<br>(NI)                          |
|                                     |                                 |                                                                                                                                |                                                                   |     |          | Diastolic                                             |                      |                                                           |                                       |
|                                     |                                 |                                                                                                                                |                                                                   |     |          | B: 77.6 ± 6.3<br>A: 78.0 ± 7.1                        | +0.40<br>(NI)        | B: 79.0 ± 8.7<br>A: 76.7 ± 8.8                            | -2.3<br>(NI)                          |
| D'Anna et al., 2014 [31]            | Diagnosis of metabolic syndrome | Capsules (30 mg of cocoa (poly)phenols, 80 mg of soy isoflavones, and 2 g of myo-inositol)<br><br>Placebo (21)<br>Treated (22) | Cocoa (poly)phenols and soy isoflavones                           | 110 | 180      | Systolic                                              |                      |                                                           |                                       |
|                                     |                                 |                                                                                                                                |                                                                   |     |          | B: 132.6 ± 20.0<br>A: 121.6 ± 9.8                     | -11.0<br>(NS)        | B: 123.6 ± 12.0<br>A: 124.0 ± 9.1                         | +0.40<br>(NS)                         |
|                                     |                                 |                                                                                                                                |                                                                   |     |          | Diastolic                                             |                      |                                                           |                                       |
|                                     |                                 |                                                                                                                                |                                                                   |     |          | B: 81.5 ± 11.9<br>A: 70.0 ± 6.3                       | -11.5<br>(NI)        | B: 80.0 ± 8.0<br>A: 73.6 ± 11.2                           | -6.4<br>(NS)                          |
| Johnson et al., 2015 [29]           | Pre- and Stage 1-Hypertension   | Blueberry powder (22 g)<br><br>Placebo (20)<br>Treated (20)                                                                    | Mix (poly)phenols (845 mg of phenolic and 46 9mg of anthocyanins) | 845 | 28<br>56 | Systolic                                              |                      |                                                           |                                       |
|                                     |                                 |                                                                                                                                |                                                                   |     |          | B: 138.0 ± 15.0<br>A28: 136 ± 15.0<br>A56: 139 ± 15.0 | -2.0<br>+1.0<br>(NS) | B: 138.0 ± 14.0<br>A28: 136.0 ± 15.0<br>A56: 131.0 ± 17.0 | -2.0<br>-7.0<br>(<0.05)               |
|                                     |                                 |                                                                                                                                |                                                                   |     |          | Diastolic                                             |                      |                                                           |                                       |
|                                     |                                 |                                                                                                                                |                                                                   |     |          | B: 78.0 ± 8.0                                         | 0.0                  | B: 80.0 ± 7.0                                             | -3.0                                  |

|  |                  |             |                  |             |             |
|--|------------------|-------------|------------------|-------------|-------------|
|  | A28: 78.0 ± 11.0 | <b>+2.0</b> | A28: 77.0 ± 10.0 | <b>-5.0</b> | <b>-7.0</b> |
|  | A56: 80.0 ± 8.0  | (NI)        | A56: 75.0 ± 9.0  | (<0.010)    | (<0.010)    |

Data are presented as the mean ± SD unless otherwise stated; B: Before intervention; A: After intervention; NS: Not significant; NI: Not indicated; C: Control; T: Treated; P: Placebo; NA: Alcoholic beer; NAB: Dealcoholized beer; DRW: Dealcoholized red wine; RW: Red wine; <sup>§</sup>: geometric mean [95% CI]; **numbers in bold** are the changes estimated as the mean difference: (A) after – (B) before (intra-group) or treated – control or placebo or comparator (between groups).

**Table S9.** Changes in inflammatory and endothelial function biomarkers as reported in human RCTs (parallel or crossover design) looking at the chronic effects of (poly)phenol-containing products in postmenopausal women, without hormone replacement therapy.

| References                   | Health status                             | Treatment Groups<br>(N participants per group) | (Poly)phenols                                                                                           | Dose<br>(poly)phenols<br>(mg /d) | Duration<br>(d) | Total circulating biomarker     |                        |                    |                        |                                                 |      |       |
|------------------------------|-------------------------------------------|------------------------------------------------|---------------------------------------------------------------------------------------------------------|----------------------------------|-----------------|---------------------------------|------------------------|--------------------|------------------------|-------------------------------------------------|------|-------|
|                              |                                           |                                                |                                                                                                         |                                  |                 | Control/Placebo/<br>Comparator  | Δ (A – B)<br>(p-value) | Treatment          | Δ (A – B)<br>(p-value) | Δ (Treatment –<br>Control/Placebo)<br>(p-value) |      |       |
| TNF-α, IL-6, CRP             |                                           |                                                |                                                                                                         |                                  |                 |                                 |                        |                    |                        |                                                 |      |       |
| Johnson et al.,<br>2017 [30] | Pre- and Stage 1-<br>Hypertension         | Blueberry powder (22 g)                        | Mix (poly)phenols<br>(845 mg of phenolic<br>and 469 mg of<br>anthocyanins)                              | 1314                             | 28              | TNF-α (pg/mL; serum)            |                        |                    |                        |                                                 |      |       |
|                              |                                           |                                                |                                                                                                         |                                  |                 | B: 5.1 ± 1.3                    | -2.0                   | B: 6.7 ± 3.0       | -2.0                   | +0.11                                           |      |       |
|                              |                                           | Placebo (20)                                   |                                                                                                         |                                  |                 | A28: 3.0 ± 0.89                 | -1.0                   | A28: 4.8 ± 3.0     | -2.0                   | -0.17                                           |      |       |
|                              |                                           | Treated (20)                                   |                                                                                                         |                                  |                 | A56: 3.7 ± 0.67                 | (<0.050)               | A56: 5.1 ± 2.8     | (<0.050)               | (0.020)                                         |      |       |
|                              |                                           |                                                |                                                                                                         |                                  |                 | CRP (mg/mL; serum) <sup>○</sup> |                        |                    |                        |                                                 |      |       |
|                              |                                           |                                                |                                                                                                         |                                  |                 | B: 2.7 ± 3.6                    | -0.05                  | B: 2.5 ± 3.9       | -0.05                  | 0.0                                             |      |       |
|                              |                                           |                                                |                                                                                                         |                                  |                 | A28: 2.6 ± 3.9                  | -0.40                  | A28: 2.4 ± 4.5     | -0.19                  | +0.21                                           |      |       |
|                              |                                           |                                                |                                                                                                         |                                  |                 | A56: 2.3 ± 5.4                  | (NS)                   | A56: 2.3 ± 4.8     | (NS)                   | (NS)                                            |      |       |
| Zern et al.,<br>2005 [40]    | Healthy                                   | Lyophilized grape powder                       | Mix grape<br>(poly)phenols<br>(anthocyanins,<br>quercetin, myricetin,<br>kaempferol and<br>resveratrol) | ~210                             | 28              | TNF-α (ng/L; plasma)            |                        |                    |                        |                                                 |      |       |
|                              |                                           | Placebo (20)                                   |                                                                                                         |                                  |                 | B: NI                           | NI                     | B: NI              | NI                     | NI                                              |      |       |
|                              |                                           | Treated (20)                                   |                                                                                                         |                                  |                 | A: 2.5 ± 1.8                    | (NI)                   | A: 2.2 ± 2.0       | (NI)                   | (<0.050)                                        |      |       |
|                              |                                           |                                                |                                                                                                         |                                  |                 | IL-6 (pg/L; plasma)             |                        |                    |                        |                                                 |      |       |
|                              |                                           |                                                |                                                                                                         |                                  |                 | B: NI                           | NI                     | B: NI              | NI                     | NI                                              |      |       |
|                              |                                           |                                                |                                                                                                         |                                  |                 | A: 2.3 ± 1.2                    | (NI)                   | A: 2.2 ± 1.3       | (NI)                   | (NS)                                            |      |       |
|                              |                                           |                                                |                                                                                                         |                                  |                 | CRP (mg/L; plasma)              |                        |                    |                        |                                                 |      |       |
|                              |                                           |                                                | B: NI                                                                                                   | NI                               | B: NI           | NI                              | NI                     |                    |                        |                                                 |      |       |
|                              |                                           |                                                |                                                                                                         |                                  |                 | A: 4.9 ± 7.7                    | (NI)                   | A: 4.6 ± 8.9       | (NI)                   | (NS)                                            |      |       |
| Curtis et al.,<br>2009 [39]  | Healthy                                   | Elderberry extracts                            | Mix anthocyanins<br>(mostly cyanidin-3-<br>glucoside) per<br>capsule                                    | 500                              | 84              | TNF-α (ng/L; plasma)            |                        |                    |                        |                                                 |      |       |
|                              |                                           | capsules (125 mg)                              |                                                                                                         |                                  |                 | B: 15.0 ± 9.3                   | -2.0                   | B: 15.0 ± 11.0     | -5.0                   | -3.0                                            |      |       |
|                              |                                           | Placebo (26)                                   |                                                                                                         |                                  |                 | A: 13.0 ± 9.2                   | (NS)                   | A: 11.0 ± 5.5      | (NS)                   | (NS)                                            |      |       |
|                              |                                           | Treated (26)                                   |                                                                                                         |                                  |                 | IL-6 (ng/L; plasma)             |                        |                    |                        |                                                 |      |       |
|                              |                                           |                                                |                                                                                                         |                                  |                 | B: 1.0 ± 1.4                    | -0.10                  | B: 1.0 ± 0.9       | 0.0                    | +0.10                                           |      |       |
|                              |                                           |                                                |                                                                                                         |                                  |                 | A: 0.90 ± 0.90                  | (NS)                   | A: 1.0 ± 0.6       | (NS)                   | (NS)                                            |      |       |
|                              |                                           |                                                |                                                                                                         |                                  |                 | CRP (mg/L; plasma)              |                        |                    |                        |                                                 |      |       |
|                              |                                           |                                                | B: 0.90 ± 0.90                                                                                          | 0.0                              | B: 1.3 ± 1.0    | 0.0                             | 0.0                    |                    |                        |                                                 |      |       |
|                              |                                           |                                                |                                                                                                         |                                  |                 | A: 0.90 ± 0.70                  | (NS)                   | A: 1.3 ± 1.1       | (NS)                   | (NS)                                            |      |       |
| Filip et al.,<br>2015 [28]   | Osteopenia<br>(mix cholesterol<br>levels) | Olive leaf extract                             | Mix (poly)phenols<br>(>40% oleuropein)                                                                  | >100<br>oleuropein               | 365             | IL-6 (pg/mL; serum)             |                        |                    |                        |                                                 |      |       |
|                              |                                           |                                                |                                                                                                         |                                  |                 |                                 |                        | B: 1.8 ± 1.4       | +0.11                  | B: 2.0 ± 2.1                                    | 0.0  | -0.11 |
|                              |                                           | Placebo (400 mg Ca capsules)                   |                                                                                                         |                                  |                 |                                 |                        | A: 1.9 ± 1.2       | (NS)                   | A: 2.0 ± 2.2                                    | (NS) | (NS)  |
|                              |                                           | (21)                                           |                                                                                                         |                                  |                 |                                 |                        | CRP (mg/L; plasma) |                        |                                                 |      |       |

|                                    |         |                                                                                               |                                                                                                                       |                             |     |                              |               |                              |               |                |
|------------------------------------|---------|-----------------------------------------------------------------------------------------------|-----------------------------------------------------------------------------------------------------------------------|-----------------------------|-----|------------------------------|---------------|------------------------------|---------------|----------------|
|                                    |         | Treated (400 mg Ca + 250 mg olive extract capsules) (27)                                      |                                                                                                                       |                             |     | B: 3.2 ± 1.6<br>A: 2.5 ± 1.9 | -0.77<br>(NS) | B: 2.8 ± 1.2<br>A: 3.2 ± 2.3 | +0.34<br>(NS) | +1.0<br>(NS)   |
| Chai et al., 2012 [41]             | Healthy | Dried plum or dried apple<br>T1: Group DP (55)<br>T2: Group DA (45)                           | Mix (poly)phenols                                                                                                     | NI                          | 90  | CRP (mg/dL; serum)           |               |                              |               |                |
|                                    |         |                                                                                               |                                                                                                                       |                             | 180 | T1: Group DP                 |               | T2: Group DA                 |               | Group DA vs DP |
|                                    |         |                                                                                               |                                                                                                                       |                             | 365 | B: 1.8 ± 5.6                 | -0.30         | B: 2.1 ± 3.5                 | 0.0           | +0.30          |
|                                    |         |                                                                                               |                                                                                                                       |                             |     | A90: 1.5 ± 3.0               | -0.20         | A90: 2.1 ± 2.9               | -0.50         | -0.30          |
|                                    |         |                                                                                               |                                                                                                                       |                             |     | A180: 1.6 ± 2.9              | -0.40         | A180: 1.6 ± 2.7              | -0.70         | -0.30          |
| Sathyapalan et al., 2018 [37]      | Healthy | Snack bars (soy protein free isoflavones or with isoflavones)<br>Placebo (60)<br>Treated (60) | Mix isoflavones                                                                                                       | 66                          | 180 | CRP (mg/L; NI)               |               |                              |               |                |
|                                    |         |                                                                                               |                                                                                                                       |                             |     | B: 2.7 ± 4.5                 | -0.50         | B: 1.7 ± 1.6                 | -0.96         | -0.46          |
|                                    |         |                                                                                               |                                                                                                                       |                             |     | A: 2.1 ± 2.3                 | (NI)          | A: 0.69 ± 0.92               | (NI)          | (NS)           |
| Estévez-Santiago et al., 2019 [44] | Healthy | Capsules<br>T1: Group X (26)<br>T2: Group A (23)<br>T3: Group A+X (23)                        | T1: Xanthophylls (lutein + zeaxanthin)<br>T2: Anthocyanins<br>T3: Anthocyanins and xanthophylls (lutein + zeaxanthin) | T1: 8.0<br>T2: 60<br>T3: 68 | 120 | IL-6 (pg/ml; plasma)         |               |                              |               |                |
|                                    |         |                                                                                               |                                                                                                                       |                             | 240 | T1: Group X                  |               | T2: Group A                  |               | Group A vs X   |
|                                    |         |                                                                                               |                                                                                                                       |                             |     | B: 1.0 ± 0.60                | +0.10         | B: 0.80 ± 0.20               | +0.60         | +0.50          |
|                                    |         |                                                                                               |                                                                                                                       |                             |     | A240: 1.1 ± 0.80             | (NS)          | A240: 1.4 ± 1.9              | (NS)          | (NS)           |
|                                    |         |                                                                                               |                                                                                                                       |                             |     |                              |               | T3: Group A+X                |               | Group A+X vs X |
|                                    |         |                                                                                               |                                                                                                                       |                             |     |                              |               | B: 1.1 ± 0.50                | +0.10         | 0.0            |
|                                    |         |                                                                                               |                                                                                                                       |                             |     |                              |               | A240: 1.2 ± 0.90             | (NS)          | (NS)           |
|                                    |         |                                                                                               |                                                                                                                       |                             |     |                              |               |                              |               | Group A+X vs A |
|                                    |         |                                                                                               |                                                                                                                       |                             |     |                              |               |                              |               | -0.50          |
|                                    |         |                                                                                               |                                                                                                                       |                             |     |                              |               |                              |               | (NS)           |
|                                    |         |                                                                                               |                                                                                                                       |                             |     | CRP (mg/L; serum)            |               |                              |               |                |
|                                    |         |                                                                                               |                                                                                                                       |                             |     | T1: Group X                  |               | T2: Group A                  |               | Group A vs X   |
|                                    |         |                                                                                               |                                                                                                                       |                             |     | B: 1.5 ± 1.8                 | +0.30         | B: 1.2 ± 0.89                | +0.60         | +0.30          |
|                                    |         |                                                                                               |                                                                                                                       |                             |     | A120: 1.8 ± 2.2              | -0.10         | A120: 1.8 ± 1.9              | +0.10         | +0.20          |
|                                    |         |                                                                                               |                                                                                                                       |                             |     | A240: 1.4 ± 1.2              | (NS)          | A240: 1.3 ± 1.2              | (NS)          | (NS)           |
|                                    |         |                                                                                               |                                                                                                                       |                             |     |                              |               | T3: Group A+X                |               | Group A+X vs X |
|                                    |         |                                                                                               |                                                                                                                       |                             |     |                              |               | B: 1.4 ± 1.3                 | +0.10         | -0.20          |
|                                    |         |                                                                                               |                                                                                                                       |                             |     |                              |               | A120: 1.5 ± 2.0              | -0.20         | -0.10          |
|                                    |         |                                                                                               |                                                                                                                       |                             |     |                              |               | A240: 1.2 ± 1.5              | (NS)          | (NS)           |
|                                    |         |                                                                                               |                                                                                                                       |                             |     |                              |               |                              |               | Group A+X vs A |
|                                    |         |                                                                                               |                                                                                                                       |                             |     |                              |               |                              |               | -0.50          |
|                                    |         |                                                                                               |                                                                                                                       |                             |     |                              |               |                              |               | -0.30          |
|                                    |         |                                                                                               |                                                                                                                       |                             |     |                              |               |                              |               | (NS)           |



| ADIPONECTIN                        |                                 |                                                                                            |                                                         |         |     |                                   |         |                                   |        |                           |
|------------------------------------|---------------------------------|--------------------------------------------------------------------------------------------|---------------------------------------------------------|---------|-----|-----------------------------------|---------|-----------------------------------|--------|---------------------------|
| Wu et al., 2012 [38]               | Healthy                         | Green tea extract capsules                                                                 | Mix (poly)phenols                                       | T1: 400 | 60  | (µg/mL; serum)                    |         | T1: Group G400                    | G400   | Group G400 <i>vs</i> p    |
|                                    |                                 | Placebo (32)                                                                               | (mostly EGCG plus                                       | T2: 800 |     | B: 17.1 [14.0, 20.0] <sup>δ</sup> | +0.90   | B: 16.4 [14.1, 19.1] <sup>δ</sup> | -0.10  | -1.0                      |
|                                    |                                 | T1: Group G400 (37)                                                                        | EC, EGC, ECG, and                                       |         |     | A: 18.0 [15.0, 21.0] <sup>δ</sup> | (NS)    | A: 16.3 [14.0, 19.0] <sup>δ</sup> | (NS)   | (NS)                      |
|                                    |                                 | T2: Group G800 (34)                                                                        | GCG)                                                    |         |     |                                   |         | T2: Group G800                    | G800   | Group G800 <i>vs</i> P    |
|                                    |                                 |                                                                                            |                                                         |         |     |                                   |         | B: 17.0 [15.0, 20.0] <sup>δ</sup> | -0.30  | -1.0                      |
|                                    |                                 |                                                                                            |                                                         |         |     |                                   |         | A: 16.7 [14.0, 20.0] <sup>δ</sup> | (NS)   | (NS)                      |
|                                    |                                 |                                                                                            |                                                         |         |     |                                   |         |                                   |        | Groups <i>vs</i> P        |
|                                    |                                 |                                                                                            |                                                         |         |     |                                   |         |                                   |        | NI                        |
|                                    |                                 |                                                                                            |                                                         |         |     |                                   |         |                                   |        | (NS)                      |
|                                    |                                 |                                                                                            |                                                         |         |     |                                   |         |                                   |        | Group G400 <i>vs</i> G800 |
|                                    |                                 |                                                                                            |                                                         |         |     |                                   |         |                                   |        | -0.20                     |
|                                    |                                 |                                                                                            |                                                         |         |     |                                   |         |                                   |        | (NS)                      |
| D’Anna et al., 2014 [31]           | Diagnosis of metabolic syndrome | Capsules (30 mg of cocoa (poly)phenols, 80 mg of soy isoflavones, and 2 g of myo-inositol) | Cocoa (poly)phenols and of soy isoflavones              | 110     | 180 | (µg/mL; serum)                    |         |                                   |        |                           |
|                                    |                                 |                                                                                            |                                                         |         |     | B: 22.0 ± 5.0                     | -6.0    | B: 18.0 ± 6.0                     | -1.0   | +5.0                      |
|                                    |                                 |                                                                                            |                                                         |         |     | A: 16.0 ± 7.0                     | (0.001) | A: 17.0 ± 4.0                     | (NS)   | (<0.001)                  |
| Dostal et al., 2016 [33]           | Overweight/obese                | Capsules (1315 mg of catechins)                                                            | Catechins                                               | 1315    | 365 | (µg/mL; plasma)                   |         |                                   |        |                           |
|                                    |                                 | Placebo (120)                                                                              |                                                         |         |     | B: 6.8 [6.1, 7.6] <sup>δ</sup>    | +0.11   | B: 6.4 [5.7, 7.2] <sup>δ</sup>    | +0.72  | +0.61                     |
|                                    |                                 | Treated (117)                                                                              |                                                         |         |     | A: 6.6 [5.9, 7.4] <sup>δ</sup>    | (0.14)  | A: 6.6 [5.9, 7.4] <sup>δ</sup>    | (0.14) | (NS)                      |
| ENDOTHELIAL FUNCTION               |                                 |                                                                                            |                                                         |         |     |                                   |         |                                   |        |                           |
| Estévez-Santiago et al., 2019 [44] | Healthy                         | Capsules                                                                                   | T1: Xanthophylls                                        | T1: 8.0 | 120 | sVCAM-1 (ng/mL; plasma)           |         |                                   |        |                           |
|                                    |                                 | T1: Group X (26)                                                                           | (lutein + zeaxanthin)                                   | T2: 60  | 240 | T1: Group X                       |         | T2: Group A                       |        | Group A <i>vs</i> X       |
|                                    |                                 | T2: Group A (23)                                                                           | T2: Anthocyanins                                        | T3: 68  |     | B: 174.0 ± 62.0                   | -14.0   | B: 185.0 ± 76.0                   | -19.0  | -5.0                      |
|                                    |                                 | T3: Group A+X (23)                                                                         | T3: Anthocyanins and xanthophylls (lutein + zeaxanthin) |         |     | A240: 160.0 ± 66.0                | (NS)    | A240: 166.0 ± 54.0                | (NS)   | (NS)                      |
|                                    |                                 |                                                                                            |                                                         |         |     |                                   |         |                                   |        | Group A+X <i>vs</i> X     |
|                                    |                                 |                                                                                            |                                                         |         |     |                                   |         |                                   |        | +11.0                     |
|                                    |                                 |                                                                                            |                                                         |         |     |                                   |         |                                   |        | (NS)                      |
|                                    |                                 |                                                                                            |                                                         |         |     |                                   |         |                                   |        | Group A+X <i>vs</i> A     |
|                                    |                                 |                                                                                            |                                                         |         |     |                                   |         |                                   |        | +16.0                     |
|                                    |                                 |                                                                                            |                                                         |         |     |                                   |         |                                   |        | (NS)                      |
|                                    |                                 |                                                                                            |                                                         |         |     | sICAM-1 (ng/mL; plasma)           |         |                                   |        |                           |
|                                    |                                 |                                                                                            |                                                         |         |     | T1: Group X                       |         | T2: Group A                       |        | Group X <i>vs</i> A       |

|                                                  |                                     |                                                                            |               |                   |    |                                                                                                   |                      |                                                                  |                         |                                               |
|--------------------------------------------------|-------------------------------------|----------------------------------------------------------------------------|---------------|-------------------|----|---------------------------------------------------------------------------------------------------|----------------------|------------------------------------------------------------------|-------------------------|-----------------------------------------------|
|                                                  |                                     |                                                                            |               |                   |    | B: 344.0 ± 179.0<br>A240: 320.0 ± 132.0                                                           | <b>-24.0</b><br>(NS) | B: 381.0 ± 208.0<br>A240: 351.0 ± 122.0                          | <b>-30.0</b><br>(NS)    | <b>-6.0</b><br>(NS)                           |
|                                                  |                                     |                                                                            |               |                   |    |                                                                                                   |                      | <b>T3: Group A+X</b><br>B: 346.0 ± 192.0<br>A240: 345.0 ± 106.0  | <b>-1.0</b><br>(NS)     | <b>Group A+X vs X</b><br><b>+23.0</b><br>(NS) |
|                                                  |                                     |                                                                            |               |                   |    |                                                                                                   |                      |                                                                  |                         | <b>Group A+X vs A</b><br><b>+29.0</b><br>(NS) |
| <b>Wang-<br/>Polagruto et<br/>al., 2006 [25]</b> | Dyslipidaemia<br>(high cholesterol) | Flavanol cocoa beverage<br>T1: Low flavanol (16)<br>T2: High flavanol (16) | Mix flavanols | T1: 43<br>T2: 446 | 42 | <b>sVCAM-1 (ng/mL; plasma)</b><br><b>T1: Low flavanol</b><br>B: 399.0 ± 138.0<br>A: 434.0 ± 186.0 | <b>+35.0</b><br>(NS) | <b>T2: High flavanol</b><br>B: 632.0 ± 148.0<br>A: 554.0 ± 107.0 | <b>-78.0</b><br>(0.009) | <b>-113.0</b><br>(0.010)                      |
|                                                  |                                     |                                                                            |               |                   |    | <b>sICAM-1 (ng/mL; plasma)</b><br><b>T1: Low flavanol</b><br>B: 166.0 ± 48.0<br>A: 162.0 ± 50.0   | <b>-3.0</b><br>(NS)  | <b>T2: High flavanol</b><br>B: 183.0 ± 32.0<br>A: 183.0 ± 44.0   | <b>-0.20</b><br>(NS)    | <b>+3.0</b><br>(NS)                           |
|                                                  |                                     |                                                                            |               |                   |    | <b>sP-Selectin (ng/mL; plasma)</b><br><b>T1: Low flavanol</b><br>B: 31.0 ± 17.0<br>A: 32.0 ± 18.0 | <b>+0.90</b><br>(NS) | <b>T2: High flavanol</b><br>B: 28.0 ± 9.6<br>A: 32.0 ± 14.0      | <b>+4.0</b><br>(NS)     | <b>+3.0</b><br>(NS)                           |
|                                                  |                                     |                                                                            |               |                   |    | <b>sE-Selectin (ng/mL; plasma)</b><br><b>T1: Low flavanol</b><br>B: 45.0 ± 17.0<br>A: 47.0 ± 21.0 | <b>+2.0</b><br>(NS)  | <b>T2: High flavanol</b><br>B: 45.0 ± 19.0<br>A: 42.0 ± 17.0     | <b>-3.0</b><br>(NS)     | <b>-5.0</b><br>(NS)                           |

Data are presented as the mean ± SD unless otherwise stated; <sup>δ</sup>: geometric mean [95% CI]; B: Before intervention; A: After intervention; NS: Not significant; NI: Not indicated; C: Control; P: Placebo; T: Treated; EGCG: Epigallocatechin gallate; EC: Epicatechin; EGC: Epigallocatechin; ECG: Epicatechin gallate; GCG: Gallocatechin gallate; DP: Dried plum; DA: Dried apple; Ca: Calcium; **numbers in bold** are the changes estimated as the mean difference: (A) after – (B) before (intra-group) or treated – control or placebo or comparator (between groups); <sup>○</sup>: The same data appear in the article by Johnson et al., 2015.

**Table S10.** Changes in oxidative stress biomarkers as reported in human RCTs (parallel or crossover design) looking at the chronic effects of (poly)phenol-containing products in postmenopausal women, without hormone replacement therapy.

| References                | Health status                     | Treatment Groups<br>(N participants per group) | (Poly)phenols                                                                            | Dose<br>(poly)phenols<br>(mg /d) | Duration<br>(d) | Total circulating biomarker                  |                        |                   |                        |                                                 |
|---------------------------|-----------------------------------|------------------------------------------------|------------------------------------------------------------------------------------------|----------------------------------|-----------------|----------------------------------------------|------------------------|-------------------|------------------------|-------------------------------------------------|
|                           |                                   |                                                |                                                                                          |                                  |                 | Control/Placebo/<br>Comparator               | Δ (A – B)<br>(p-value) | Treatment         | Δ (A – B)<br>(p-value) | Δ (Treatment –<br>Control/Placebo)<br>(p-value) |
| CHEMICAL BIOMARKERS       |                                   |                                                |                                                                                          |                                  |                 |                                              |                        |                   |                        |                                                 |
| Johnson et al., 2017 [30] | Pre- and Stage 1-<br>Hypertension | Blueberry powder (22 g)                        | Mix (poly)phenols (845 mg of phenolic and 469 mg of anthocyanins)                        | 845                              | 28              | <b>Ox-LDL (ng/mL; serum)</b>                 |                        |                   |                        |                                                 |
|                           |                                   |                                                |                                                                                          |                                  | 56              | B: 424.0 ± 37.0                              | -104.6                 | B: 383.0 ± 24.0   | -45.1                  | +59.5                                           |
|                           |                                   | Placebo (20)                                   |                                                                                          |                                  |                 | A28: 319.4 ± 60.0                            | -15.0                  | A28: 337.9 ± 38.0 | +17.4                  | +32.4                                           |
|                           |                                   | Treated (20)                                   |                                                                                          |                                  |                 | A56: 408.8 ± 133.0                           | (28d)                  | A56: 400.4 ± 21.0 | (28d)                  | (NS)                                            |
|                           |                                   |                                                |                                                                                          |                                  |                 |                                              | (<0.050)               |                   | (<0.050)               |                                                 |
|                           |                                   |                                                |                                                                                          |                                  |                 | <b>Isoprostanes (pg/mL; serum)</b>           |                        |                   |                        |                                                 |
|                           |                                   |                                                |                                                                                          |                                  |                 | B: 15.1 ± 14.0                               | -5.2                   | B: 18.6 ± 8.4     | -2.7                   | +2.5                                            |
|                           |                                   |                                                |                                                                                          |                                  |                 | A28: 9.9 ± 5.8                               | -3.2                   | A28: 15.9 ± 8.3   | -6.8                   | -3.6                                            |
|                           |                                   |                                                |                                                                                          |                                  |                 | A56: 11.9 ± 7.5                              | (28d)                  | A56: 11.8 ± 4.6   | (56d)                  | (NS)                                            |
|                           |                                   |                                                |                                                                                          |                                  |                 |                                              | (<0.050)               |                   | (<0.050)               |                                                 |
|                           |                                   |                                                |                                                                                          |                                  |                 | <b>8-OHdG (ng/mL; plasma)</b>                |                        |                   |                        |                                                 |
|                           |                                   |                                                |                                                                                          |                                  |                 | B: 0.31 ± 0.04                               | +0.04                  | B: 0.32 ± 0.04    | -0.04                  | -0.08                                           |
|                           |                                   |                                                |                                                                                          | A28: 0.35 ± 0.92                 | +0.04           | A28: 0.28 ± 0.04                             | 0.0                    | -0.04             |                        |                                                 |
|                           |                                   |                                                |                                                                                          | A56: 0.35 ± 0.04                 | (NS)            | A56: 0.32 ± 0.06                             | (NS)                   | (28d)             |                        |                                                 |
|                           |                                   |                                                |                                                                                          |                                  |                 |                                              |                        | (0.008)           |                        |                                                 |
|                           |                                   |                                                |                                                                                          |                                  |                 | <b>TBARS (μM; serum)</b>                     |                        |                   |                        |                                                 |
|                           |                                   |                                                |                                                                                          |                                  |                 | B: 2.0 ± 0.60                                | +0.50                  | B: 1.9 ± 0.50     | +0.80                  |                                                 |
|                           |                                   |                                                |                                                                                          |                                  |                 | A28: 2.5 ± 1.7                               | -0.10                  | A28: 2.7 ± 1.5    | +0.30                  |                                                 |
|                           |                                   |                                                |                                                                                          |                                  |                 | A56: 1.9 ± 0.40                              | (NS)                   | A56: 2.2 ± 0.80   | (NS)                   |                                                 |
|                           |                                   |                                                |                                                                                          |                                  |                 |                                              |                        |                   | (NS)                   |                                                 |
| Zern et al., 2005 [40]    | Healthy                           | Lyophilized grape powder                       | Mix grape (poly)phenols (anthocyanins, quercetin, myricetin, kaempferol and resveratrol) | ~210                             | 28              | <b>Isoprostanes (ng/mg creatinine urine)</b> |                        |                   |                        |                                                 |
|                           |                                   |                                                |                                                                                          |                                  |                 | B: NI                                        | NI                     | B: NI             | NI                     | NI                                              |
|                           |                                   | Placebo (20)                                   |                                                                                          |                                  |                 | A: 1.1 ± 0.80                                | (NI)                   | A: 1.0 ± 0.95     | (NI)                   | (S)                                             |
|                           |                                   | Treated (20)                                   |                                                                                          |                                  |                 |                                              |                        |                   |                        |                                                 |
| Chai et al., 2012 [41]    | Healthy                           | Dried plum or dried apple                      | Mix (poly)phenols                                                                        | NI                               | 90              | <b>LPO (μmol/L; serum)</b>                   |                        |                   |                        |                                                 |
|                           |                                   | T1: Group DP (55)                              |                                                                                          |                                  | 180             | <b>Group DP</b>                              |                        | <b>Group DA</b>   |                        | <b>Group DA vs DP</b>                           |

|                           |                               |                         |                                                                   |      |                 |                                |                   |                  |              |
|---------------------------|-------------------------------|-------------------------|-------------------------------------------------------------------|------|-----------------|--------------------------------|-------------------|------------------|--------------|
| Tz: Group DA (45)         |                               |                         |                                                                   | 365  | B: 52.4 ± 43    | <b>-12.4</b>                   | B: 58.9 ± 43.0    | <b>-12.2</b>     | <b>+0.20</b> |
|                           |                               |                         |                                                                   |      | A90: 40.0 ± 65  | <b>+7.9</b>                    | A90: 46.7 ± 56.0  | <b>+0.20</b>     | <b>-7.7</b>  |
|                           |                               |                         |                                                                   |      | A180: 60.3 ± 25 | <b>-19.8</b>                   | A180: 59.1 ± 27.0 | <b>-19.7</b>     | <b>+0.10</b> |
|                           |                               |                         |                                                                   |      | A365: 32.6 ± 29 | (0.001)                        | A365: 39.2 ± 27.0 | (0.022)          | (NS)         |
| ANTIOXIDANTS ENZYMES      |                               |                         |                                                                   |      |                 |                                |                   |                  |              |
| Johnson et al., 2017 [30] | Pre- and Stage 1-Hypertension | Blueberry powder (22 g) | Mix (poly)phenols (845 mg of phenolic and 469 mg of anthocyanins) | 1314 | 28              | SOD (U/mL; serum) <sup>○</sup> |                   |                  |              |
|                           |                               |                         |                                                                   |      | 356             | B: 0.23 ± 0.22                 | <b>+0.17</b>      | B: 0.21 ± 0.27   | <b>+0.15</b> |
|                           |                               |                         |                                                                   |      |                 | A28: 0.40 ± 0.27               | <b>+0.26</b>      | A28: 0.36 ± 0.49 | <b>+0.29</b> |
|                           |                               |                         |                                                                   |      |                 | A56: 0.49 ± 0.67               | (<0.001)          | A56: 0.50 ± 0.98 | (<0.001)     |
|                           |                               |                         |                                                                   |      |                 | GSR (nmol/min/mL; plasma)      |                   |                  |              |
|                           |                               |                         |                                                                   |      |                 | B: 8.8 ± 4.0                   | <b>+5.3</b>       | B: 8.9 ± 4.4     | <b>+5.2</b>  |
|                           |                               |                         |                                                                   |      |                 | A28: 14.1 ± 5.3                | <b>+8.1</b>       | A28: 14.1 ± 4.7  | <b>+6.7</b>  |
|                           |                               |                         |                                                                   |      |                 | A56: 16.8 ± 4.0                | (<0.050)          | A56: 15.6 ± 3.9  | (<0.05)      |
|                           |                               |                         |                                                                   |      |                 | GPx (nmol/min/mL; plasma)      |                   |                  |              |
|                           |                               |                         |                                                                   |      |                 | B: 29.4 ± 30.0                 | <b>+58.8</b>      | B: 29.8 ± 22     | <b>+61.9</b> |
|                           |                               |                         |                                                                   |      |                 | A28: 88.2 ± 25.0               | <b>+19.3</b>      | A28: 91.7 ± 23   | <b>+34.4</b> |
|                           |                               |                         |                                                                   |      |                 | A56: 48.7 ± 25.0               | (<0.05)           | A56: 64.2 ± 37   | (<0.05)      |

Data are presented as the mean ± SD; B: Before intervention; A: After intervention; NS: not significant; NI: not indicated; C: Control; T: Treated; P: Placebo; DP: Dried plum; DA: Dried apple; **numbers in bold** are the changes estimated as the mean difference: (A) after – (B) before (intra-group) or treated – control or placebo or comparator (between groups). Ox-LDL: oxidized LDL; 8-OHGdG: 8-hydroxy-guanosine TBARS: thiobarbituric acid reactive substances; LPO: lipid hydroperoxide; SOD; superoxide dismutase; GSR: glutathione reductase; GPX: glutathione peroxidase; <sup>○</sup>: The same data appear in the article by Johnson et al., 2015.
